# Supplementary material
Source: publisher site journal article supplement (https://www.spandidos-publications.com/1009/downloadSupplementary)
Supplement: Supplementary file 1 [file downloadSupplementary]

## Sheet: Upregulated
Table SII. Dysregulated circular RNAs in bladder cancer.
（）	P-value and FDR		Fold change and Regulation		Annotations											Group--Raw Intensity		Group--Normalized Intensity		Raw Intensity								Normalized Intensity								miRNA Binding Sites
probeID	P-value	FDR	FC (abs)	Regulation	circRNA	Alias	source	chrom	strand	txStart	txEnd	circRNA_type	best_transcript	GeneSymbol	Sequence	group-Test(raw)	group-Control(raw)	group-Test(normalized)	group-Control(normalized)	[B5, Test](raw)	[B7, Test](raw)	[B11, Test](raw)	[B13, Test](raw)	[B2C, Control](raw)	[B4C, Control](raw)	[B5C, Control](raw)	[B13C, Control](raw)	[B5, Test](normalized)	[B7, Test](normalized)	[B11, Test](normalized)	[B13, Test](normalized)	[B2C, Control](normalized)	[B4C, Control](normalized)	[B5C, Control](normalized)	[B13C, Control](normalized)	MRE1	MRE2	MRE3	MRE4	MRE5
ASCRP3003345	0.0271898	0.371177	6.904	up	hsa_circRNA_001588	hsa_circ_0001588	circBase	chr6	+	26204839	26205043	sense overlapping	NM_003545	HIST1H4E	ATTTCTGGTCTCATCTACGAGGAGACTCGCGGGATTTTTGCGGCTATTTTCGTTGGTGTG	10958.1	373.375	11.8552	9.06778	1622.5	755	20467	20988	479	455	288.5	271	10.4323	10.1903	13.3818	13.4164	9.65971	9.69533	8.49668	8.4194	hsa-miR-3121-5p	hsa-miR-514b-3p	hsa-miR-514a-3p	hsa-miR-4786-5p	hsa-miR-204-5p
ASCRP3012916	0.00759855	0.371177	6.71639	up	hsa_circRNA_103493	hsa_circ_0006801	circBase	chr3	+	149613259	149639014	exonic	NM_007282	RNF13	TTCAAGAAAGGTTTTAAATGCACAGAGAGCAGGATACAAGGCAGCCATAGTTCACAATGT	1833.38	72.25	9.85798	7.11029	530.5	218	3284	3301	75	87	62	65	8.98629	8.37948	11.026	11.0401	7.01436	7.40964	6.99933	7.01784	hsa-miR-580-5p	hsa-miR-7-5p	hsa-miR-889-5p	hsa-miR-619-3p	hsa-miR-613
ASCRP3003002	0.0326767	0.371177	6.33236	up	hsa_circRNA_400945		25242744	chr12	-	46633461	46633676	exonic	NM_030674	SLC38A1	ATGATTTCACCGAAGTAGAAAATGGTCAGATAAATAGGGGTGTCAAGCTTCCATTTTGGT	1872.88	52.75	9.46149	6.79875	212.5	117	3539	3623	64	57	45	45	7.97647	7.62226	11.1092	11.138	6.8427	6.89763	6.71208	6.74258	hsa-miR-513c-3p	hsa-miR-513a-3p	hsa-miR-3616-5p	hsa-miR-3198	hsa-miR-223-5p
ASCRP3004255	0.0415415	0.371177	6.18579	up	hsa_circRNA_102039	hsa_circ_0043138	circBase	chr17	+	34147027	34149837	exonic	NM_003487	TAF15	CAGCAGTCCTATCATTCACAAAGGGAAAACTACAGCCACCACACACAAGTTATTCTACCT	3815	144.25	10.4342	7.80523	499	255	7679	6827	114	248	107	108	8.91625	8.61789	12.1989	12.0037	7.53241	8.76817	7.46056	7.45979	hsa-miR-15b-3p	hsa-miR-29b-1-5p	hsa-miR-20b-3p	hsa-miR-487a-5p	hsa-miR-487b-5p
ASCRP3007932	0.0106029	0.371177	5.88995	up	hsa_circRNA_003956	hsa_circ_0003956	circBase	chr3	+	149563797	149613357	exonic	ENST00000474348	RNF13	GACCTCATTAGCATGGGATCCAACGACAGTAAGTACAGGTGATTTTACAACGAGATGCTG	1523.25	68.875	9.62054	7.06228	443	173	2758	2719	81	70	61.5	63	8.77996	8.09213	10.8251	10.7849	7.12267	7.13999	6.98573	7.00074	hsa-miR-654-3p	hsa-miR-3660	hsa-miR-4474-3p	hsa-miR-3133	hsa-miR-511-5p
ASCRP3013255	0.0105467	0.371177	5.30233	up	hsa_circRNA_103487	hsa_circ_0006697	circBase	chr3	+	149563797	149570383	exonic	NM_007282	RNF13	TTGGTTATAGACTTCCAGCTGAAGGTTTAAAGGTGATTTTACAACGAGATGCTGCTCTCC	1317.75	70	9.48445	7.07783	351	186.5	2396	2337.5	79	77	58	66	8.5266	8.19098	10.6273	10.5929	7.07212	7.26862	6.95273	7.01784	hsa-miR-654-3p	hsa-miR-632	hsa-miR-324-5p	hsa-miR-431-5p	hsa-miR-708-5p
ASCRP3009256	0.0257678	0.371177	5.13982	up	hsa_circRNA_000543	hsa_circ_0000326	circBase	chr11	+	65272490	65272586	intronic	TCONS_l2_00004572	XLOC_l2_002352	GCTGGAGTAACTGGCATGTGAACAAGCTTTTTCTGTATTTACATACAAAGTCAGATCAGT	2488.38	133.75	10.1194	7.75772	698.5	217	4501	4537	115.5	200	110.5	109	9.29368	8.37528	11.4044	11.4044	7.562	8.47488	7.51641	7.47758	hsa-miR-338-3p	hsa-miR-9-3p	hsa-miR-16-2-3p	hsa-miR-320b	hsa-miR-320a
ASCRP3000476	0.0245693	0.371177	4.72018	up	hsa_circRNA_087856	hsa_circ_0087856	circBase	chr9	+	110062421	110084399	exonic	NM_002874	RAD23B	AACTACGACAGCAACAACTACAACAACAAGTTCTGGAGGTGAAAGCACTGAAAGAGAAGA	2178.38	135.5	9.98146	7.74262	295.5	358	3975	4085	139	100	149	154	8.33435	9.09439	11.2269	11.2702	7.80466	7.54836	7.78162	7.83582	hsa-miR-3692-5p	hsa-miR-6511b-5p	hsa-miR-4763-3p	hsa-miR-4518	hsa-miR-1266-5p
ASCRP3013337	0.0478134	0.371177	4.68401	up	hsa_circRNA_101303	hsa_circ_0030998	circBase	chr13	+	113963957	113964177	exonic	NM_005561	LAMP1	TTTATAACTTGTCAGACACACACCTTTTCCCCAATGCGAGCTCCAAAGAACATGACCTTT	2218.5	116.125	9.82057	7.59282	429	152	4111	4182	118	176	83	87.5	8.75947	7.95614	11.2802	11.2865	7.58127	8.32767	7.21105	7.25131	hsa-miR-29b-3p	hsa-miR-556-5p	hsa-miR-335-5p	hsa-miR-29c-3p	hsa-miR-1323
ASCRP3004508	0.032667	0.371177	4.53636	up	hsa_circRNA_104854	hsa_circ_0087862	circBase	chr9	+	110068659	110081160	exonic	NM_002874	RAD23B	CAGTTTCAACAACCCTGACAGAGCAGTGGAGTATCTTTTAATGCCCAAAGCAGTGTCCAC	1511.62	88.625	9.48497	7.30344	209	200.5	2755	2882	95.5	82	85	92	7.96228	8.28501	10.8214	10.8712	7.34913	7.32298	7.23318	7.30846	hsa-miR-325	hsa-miR-593-3p	hsa-miR-512-3p	hsa-miR-653-5p	hsa-miR-766-5p
ASCRP3007933	0.014905	0.371177	4.45355	up	hsa_circRNA_103489	hsa_circ_0067717	circBase	chr3	+	149563797	149613347	exonic	NM_007282	RNF13	GACCTCATTAGCATGGGATCCAACGACAGTGATTTTACAACGAGATGCTGCTCTCCATAG	1660.25	121.625	9.82679	7.67183	546.5	234.5	2952	2908	140	123	111.5	112	9.02307	8.47981	10.9235	10.8807	7.81777	7.85819	7.50518	7.50617	hsa-miR-654-3p	hsa-miR-511-5p	hsa-miR-632	hsa-miR-643	hsa-miR-889-5p
ASCRP3013462	0.00253591	0.34873	4.44686	up	hsa_circRNA_002082	hsa_circ_0002082	circBase	chr11	+	65271199	65272066	sense overlapping	NR_002819	MALAT1	TTTGCTGGTGTATTTTTAGAAACTTTGTCTGCGAACACTCTTTAATGGACCAGATCAGGA	1734.75	251.625	10.4268	8.27403	823	1232.5	2411	2472.5	135	118.5	370	383	9.47072	10.9513	10.6383	10.6469	7.77702	7.78581	8.73815	8.79515	hsa-miR-512-5p	hsa-miR-4773	hsa-miR-3611	hsa-miR-4742-3p	hsa-miR-6887-3p
ASCRP3005330	0.0453879	0.371177	4.3312	up	hsa_circRNA_002908	hsa_circ_0002908	circBase	chr8	-	141840570	141874498	exonic	NM_005607	PTK2	CCTAAGAGTTTACTGGATTCTGTCAAGATATGAATTGAGAATTCGTTATTTGCCAAAAGG	1173.75	62.625	9.07878	6.96402	234	81	2163	2217	62	67	61.5	60	8.09571	7.22614	10.4738	10.5195	6.81105	7.09368	6.99933	6.952	hsa-miR-545-5p	hsa-miR-6812-3p	hsa-miR-33b-5p	hsa-miR-302b-5p	hsa-miR-3148
ASCRP3000550	0.026475	0.371177	4.2539	up	hsa_circRNA_103514	hsa_circ_0006156	circBase	chr3	+	171965322	171969331	exonic	NM_022763	FNDC3B	AAGAAGCAGCCCAAAGTCGAATGATTCAGACTTGCAAGGTGATTGAAGATAGTACTGGAG	6263.12	536.625	11.5993	9.51055	1237	1273	11216.5	11326	363.5	680	541	562	10.0497	11.0074	12.6701	12.6701	9.22993	10.4082	9.17238	9.23166	hsa-miR-147b	hsa-miR-510-5p	hsa-miR-15b-3p	hsa-miR-1323	hsa-miR-552-3p
ASCRP3008860	0.0291156	0.371177	4.25239	up	hsa_circRNA_007148	hsa_circ_0007148	circBase	chr3	+	171851260	171969331	exonic	NM_022763	FNDC3B	GCAAGAAGCAGCCCAAAGTCGAATGATTCAGACTTGCAAGGTTATTCTCGTTCAAGTTAA	5955.5	501.75	11.5032	9.41494	1141	1186.5	10910	10584.5	340	663	507	497	9.91745	10.9036	12.6149	12.577	9.13901	10.3516	9.08877	9.08034	hsa-miR-6785-5p	hsa-miR-1275	hsa-miR-490-3p	hsa-miR-1229-5p	hsa-miR-6088
ASCRP3001950	0.0368615	0.371177	4.01698	up	hsa_circRNA_104707	hsa_circ_0003221	circBase	chr8	-	141856358	141900868	exonic	NM_005607	PTK2	AGATGCGGGGCAATGCACTAGAAAAGAAGTCTAACTATGAAGTATTAGAAATATGACAGA	1380.62	102	9.44513	7.43902	284	164	2541.5	2533	79	103	112	114	8.28836	8.03924	10.7455	10.7074	7.10238	7.62089	7.51014	7.52266	hsa-miR-301a-5p	hsa-miR-125a-3p	hsa-miR-134-5p	hsa-miR-222-5p	hsa-miR-501-5p
ASCRP3010249	0.0174434	0.371177	3.95819	up	hsa_circRNA_103491	hsa_circ_0003502	circBase	chr3	+	149563797	149629870	exonic	NM_007282	RNF13	GTGGGCATCTGTCTCATCTTGATAGTCATTTTCATGGTGATTTTACAACGAGATGCTGCT	1414	125.5	9.65328	7.66844	485	218	2463	2490	151	85	134	132	8.87196	8.38884	10.6811	10.6712	7.94705	7.36367	7.69007	7.67296	hsa-miR-654-3p	hsa-miR-7-5p	hsa-miR-511-5p	hsa-miR-632	hsa-miR-643
ASCRP3008766	0.0428439	0.371177	3.74701	up	hsa_circRNA_104853	hsa_circ_0087861	circBase	chr9	+	110068659	110074018	exonic	NM_002874	RAD23B	GATTCTTCTCGGTCAAACCTTTTTGAAGATGCAACGAGTGCACTTGCCCAAAGCAGTGTC	1409.75	111.875	9.48289	7.57715	222	223	2668	2526	130	120	97	100.5	8.02618	8.4052	10.7999	10.7003	7.71681	7.81119	7.38132	7.39929	hsa-miR-325	hsa-miR-593-3p	hsa-miR-512-3p	hsa-miR-766-5p	hsa-miR-28-5p
ASCRP3001500	0.0391084	0.371177	3.68714	up	hsa_circRNA_104852	hsa_circ_0006174	circBase	chr9	+	110064315	110068928	exonic	NM_002874	RAD23B	ACTAGCCCAACAGCAACTGACAGGCAAAATCCTCAATGATGATACTGCTCTCAAAGAATA	1188	94.125	9.26549	7.38298	197	183	2232	2140	100	108.5	80	88	7.89561	8.18863	10.5039	10.4738	7.38213	7.66578	7.20421	7.27981	hsa-miR-138-5p	hsa-miR-325	hsa-miR-593-3p	hsa-miR-512-3p	hsa-miR-766-5p
ASCRP3009579	0.0367284	0.371177	3.44501	up	hsa_circRNA_104052	hsa_circ_0008285	circBase	chr6	+	4891946	4892613	exonic	NM_004824	CDYL	GGCCACAGGCTTAGCTGTTAACGGGAAAGGTTGAAAGGATTGTTGACAAAAGGAAAAATA	2549.5	248.75	10.3313	8.5468	805	352	4423.5	4617.5	296	277.5	211.5	210	9.44987	9.05744	11.3766	11.4414	8.9475	8.92801	8.15009	8.16161	hsa-miR-892a	hsa-miR-378a-5p	hsa-miR-887-5p	hsa-miR-22-5p	hsa-miR-328-3p
ASCRP3011886	0.0445381	0.371177	3.37267	up	hsa_circRNA_101270	hsa_circ_0003441	circBase	chr13	+	61013821	61041513	exonic	NM_030794	TDRD3	TGAGAAATGGGAGTTACAGAGAGTATCTTTCAGATGAAGGCATTGAAGCTTGCACAAGCT	1098.62	113.125	9.31486	7.56097	194	261	1961	1978.5	114	183.5	77	78	7.88213	8.63017	10.3717	10.3754	7.55591	8.3761	7.14159	7.17027	hsa-miR-424-5p	hsa-miR-153-5p	hsa-miR-125a-5p	hsa-miR-891b	hsa-miR-27b-5p
ASCRP3005796	0.0496662	0.371177	3.30335	up	hsa_circRNA_002178	hsa_circ_0000519	circBase	chr14	-	20811436	20811534	sense overlapping	NR_002312	RPPH1	CTAACAGGGCTCTCCCTGAGCTTCGGGGAGCTGAGTGCGTCCTGTCACTCCACTCCCATG	2126.5	206.75	10.0256	8.3017	462	312	3758.5	3973.5	207	255	175	190	8.82087	8.88989	11.1649	11.2269	8.37735	8.81611	7.95288	8.06046	hsa-miR-328-3p	hsa-miR-1296-5p	hsa-miR-146b-3p	hsa-miR-330-5p	hsa-miR-671-5p
ASCRP3009197	0.0442054	0.371177	3.29868	up	hsa_circRNA_104709	hsa_circ_0006646	circBase	chr8	-	141889569	141900868	exonic	NM_005607	PTK2	GCTCACCCACCAGAGGAGTGGAAAATATGACAGATACCTAGCATCTAGCAAAATAATGGC	1224.88	124.5	9.40512	7.68323	229	252	2220	2198.5	111	181	101	105	8.05612	8.56844	10.4952	10.5008	7.51099	8.36016	7.42464	7.43714	hsa-miR-125a-3p	hsa-miR-134-5p	hsa-miR-301a-5p	hsa-miR-758-3p	hsa-miR-137
ASCRP3001941	0.0331264	0.371177	3.25244	up	hsa_circRNA_104532	hsa_circ_0001772	circBase	chr7	+	155465560	155473602	exonic	NM_053043	RBM33	AGATGAATTTACATGAACTTGAAGATGATTTACTTGGAGAAGATTTGCTATCTGGCAAAA	729.5	75.75	8.83344	7.13192	215	127	1277.5	1298.5	65	130	56	52	7.99246	7.74394	9.78637	9.81099	6.86098	7.91646	6.91187	6.83837	hsa-miR-578	hsa-miR-125b-5p	hsa-miR-26b-3p	hsa-miR-512-5p	hsa-miR-335-3p
ASCRP3012864	0.0103162	0.371177	3.18126	up	hsa_circRNA_100242	hsa_circ_0002316	circBase	chr1	-	58971731	59004982	exonic	NM_145243	OMA1	TTATACCTCAGGTAGTCAAGTGAAAAAATGAGCTTCATCTGTGGATTGCAGTCTGCTGCT	861.375	113.25	9.26061	7.59102	265.5	323	1422	1435	116	142	101	94	8.20383	8.9393	9.95391	9.94541	7.56924	8.04309	7.40261	7.34913	hsa-miR-136-5p	hsa-miR-145-5p	hsa-miR-618	hsa-miR-606	hsa-miR-766-5p
ASCRP3002691	0.0213978	0.371177	3.17466	up	hsa_circRNA_103490	hsa_circ_0004565	circBase	chr3	+	149563797	149619949	exonic	NM_007282	RNF13	ATATGAAAAAGGGTGATTTTACAACGAGATGCTGCTCTCCATAGGGATGCTCATGCTGTC	995.375	118.75	9.30336	7.63675	324	209	1716	1732.5	144	105.5	103.5	122	8.43236	8.33452	10.2119	10.2346	7.88213	7.62875	7.43688	7.59925	hsa-miR-654-3p	hsa-miR-511-5p	hsa-miR-632	hsa-miR-643	hsa-miR-889-5p
ASCRP3011950	0.0252516	0.371177	3.15584	up	hsa_circRNA_103488	hsa_circ_0067716	circBase	chr3	+	149563797	149589941	exonic	NM_007282	RNF13	TGATATAAAGGTGATTTTACAACGAGATGCTGCTCTCCATAGGGATGCTCATGCTGTCAG	1084.88	127.75	9.3825	7.72448	317	229	1901	1892.5	154	118	115	124	8.40753	8.44385	10.3409	10.3378	7.95614	7.78162	7.55328	7.60688	hsa-miR-654-3p	hsa-miR-511-5p	hsa-miR-632	hsa-miR-1264	hsa-miR-650
ASCRP3000331	0.0229102	0.371177	3.02092	up	hsa_circRNA_103492	hsa_circ_0001346	circBase	chr3	+	149563797	149639014	exonic	NM_007282	RNF13	AAATTCAAGAAAGGTGATTTTACAACGAGATGCTGCTCTCCATAGGGATGCTCATGCTGT	1102.38	141.875	9.44362	7.84864	383	236	1870	1920.5	160	136	136.5	135	8.60471	8.48924	10.3245	10.356	7.99868	7.99546	7.70469	7.69571	hsa-miR-654-3p	hsa-miR-34b-5p	hsa-miR-580-5p	hsa-miR-7-5p	hsa-miR-511-5p
ASCRP3001158	0.0359443	0.371177	3.02085	up	hsa_circRNA_104479	hsa_circ_0001741	circBase	chr7	-	128655032	128658211	exonic	NM_012470	TNPO3	ACAGTAGTATCTCTATTGGTTCATGCATGGGAGATCTCAGACCAGTTGTTACAGATCCGG	731.5	80.75	8.83218	7.23722	136	180	1285	1325	91	89	72	71	7.51568	8.16718	9.79661	9.84925	7.28097	7.43714	7.11976	7.11103	hsa-miR-545-3p	hsa-miR-199b-5p	hsa-miR-552-3p	hsa-miR-188-5p	hsa-miR-199a-5p
ASCRP3011794	0.0221767	0.371177	2.96485	up	hsa_circRNA_101488	hsa_circ_0000591	circBase	chr15	+	41961025	41962156	exonic	NM_001080541	MGA	TGAAGCAAGAGATTTCTGAATGGATGGGAAGGCCATTGTGACTATGTGGTGATTACAGTT	408.875	38.25	8.11337	6.54541	105	79	725.5	726	38.5	33.5	44	37	7.25662	7.21288	8.99404	8.98993	6.40959	6.44586	6.69702	6.62917	hsa-miR-130b-3p	hsa-miR-182-5p	hsa-miR-205-3p	hsa-miR-492	hsa-miR-222-5p
ASCRP3001253	0.0334656	0.371177	2.95338	up	hsa_circRNA_103254	hsa_circ_0001247	circBase	chr22	+	46125304	46136418	exonic	NM_013236	ATXN10	ACCAAGACAAGAGTTACACTGTTAGACCTTATGATAGCCAAGATAACGAGTGATGAGCCA	833.5	109.625	9.11761	7.55525	165	307	1407	1455	156	111.5	88	83	7.69701	8.86536	9.93567	9.97241	7.98999	7.72545	7.28284	7.2227	hsa-miR-660-5p	hsa-miR-18b-5p	hsa-miR-640	hsa-miR-588	hsa-miR-519e-3p
ASCRP3008101	0.0330594	0.371177	2.91628	up	hsa_circRNA_101319	hsa_circ_0000524	circBase	chr14	-	23378691	23380612	exonic	NM_018107	RBM23	GAGACAAGCAAATCTGACAGGATGGCATCTGATGACTTTGACATAGTGATTGAGGCCATG	800	99.625	8.9834	7.43927	200	181	1395	1424	102.5	120	84	92	7.90927	8.173	9.91941	9.93193	7.40937	7.79323	7.23318	7.32129	hsa-miR-138-5p	hsa-miR-135a-3p	hsa-miR-338-3p	hsa-miR-135b-5p	hsa-miR-135a-5p
ASCRP3005516	0.01036	0.371177	2.89626	up	hsa_circRNA_100241	hsa_circ_0000072	circBase	chr1	-	58971731	59002413	exonic	NM_145243	OMA1	CCTTCTCATGGCAATCGAGTTGAGTACTTGGATAGACTTATACCTCAGGGGCATAAGGAA	830.625	124.25	9.23988	7.70569	288	304	1370	1360.5	139	141	112	105	8.31359	8.85663	9.89776	9.89155	7.81777	8.03907	7.52217	7.44375	hsa-miR-136-5p	hsa-miR-606	hsa-miR-145-5p	hsa-miR-153-5p	hsa-miR-302d-5p
ASCRP3011480	0.00840559	0.371177	2.88139	up	hsa_circRNA_100240	hsa_circ_0012717	circBase	chr1	-	58971731	58971881	exonic	NM_145243	OMA1	TCGAGTTGAGTACTTGGATAGACTTATACCTCAGGCTTGTGCAGACATAAGAGCCAGTTC	884.25	134.5	9.30969	7.78293	329.5	301.5	1474	1432	159	109	135	135	8.4558	8.84971	9.99379	9.93947	8.02219	7.70867	7.69788	7.70296	hsa-miR-136-5p	hsa-miR-296-3p	hsa-miR-147a	hsa-miR-656-5p	hsa-miR-744-3p
ASCRP3002477	0.0130831	0.371177	2.80414	up	hsa_circRNA_103516	hsa_circ_0003692	circBase	chr3	+	171969049	172028671	exonic	NM_022763	FNDC3B	AGTGGGATGAGAAATTATACCATTTTATGGAATGTCAACCTACATCACCCGAGAAGACCA	545.625	72.5	8.58756	7.1	172	151	938.5	921	72	72.5	70.5	75	7.77033	7.9368	9.33966	9.30347	7.00074	7.1861	7.08294	7.13023	hsa-miR-147b	hsa-miR-19b-1-5p	hsa-miR-134-3p	hsa-miR-576-5p	hsa-miR-493-5p
ASCRP3001294	0.0166867	0.371177	2.75926	up	hsa_circRNA_002863	hsa_circ_0002863	circBase	chr2	-	69585460	69590802	exonic	NM_002056	GFPT1	ACCAGCTTTACTACCTTGGTGGAGAGAGTTATCCAACAATTGAGCAACAAGATATGGATT	483.5	63.875	8.46109	6.99681	202	120	811	801	55.5	107	48	45	7.91646	7.67694	9.13736	9.11362	6.75683	7.65811	6.82974	6.74258	hsa-miR-4782-3p	hsa-miR-6844	hsa-miR-597-3p	hsa-miR-4700-3p	hsa-miR-4761-5p
ASCRP3008594	0.0260618	0.371177	2.74813	up	hsa_circRNA_005078	hsa_circ_0005078	circBase	chr2	+	203419974	203421254	exonic	NM_001204	BMPR2	GATCTTTCAGCCACAAATGTCCTGGATGGCAGCAGTATACAGACAACCTGTCACATAATA	546.25	71.125	8.54563	7.08718	170	130	974	911	52	100.5	64	68	7.74504	7.75595	9.38845	9.29309	6.67828	7.59122	7.02423	7.05498	hsa-miR-636	hsa-miR-218-5p	hsa-miR-924	hsa-miR-6874-3p	hsa-miR-6071
ASCRP3009444	0.0431256	0.371177	2.74116	up	hsa_circRNA_100133	hsa_circ_0000043	circBase	chr1	-	31465236	31468067	exonic	NM_014676	PUM1	GGACTTTTTGACTACAATTCTCAACAACAGGGCCCAAGGGATGCAGACAGTGATGAAAAC	402.75	39.5	8.02583	6.57105	99	58	746	708	55	49	26	28	7.21507	6.90442	9.03395	8.94989	6.71208	6.74763	6.41277	6.41171	hsa-miR-590-5p	hsa-miR-330-5p	hsa-miR-767-5p	hsa-miR-885-5p	hsa-miR-550a-3-5p
ASCRP3013229	0.0301283	0.371177	2.74004	up	hsa_circRNA_100718	hsa_circ_0002669	circBase	chr10	+	128768965	128798571	exonic	NM_001380	DOCK1	TTGGAGTGGCTGCTTTTTATAACTATGATGCCAGAGGAGCGGATGAACTTTCTTTACAGA	418	46	8.14832	6.69413	169	57	723	723	46	48	46	44	7.73192	6.88836	8.98993	8.98308	6.60034	6.72954	6.73801	6.70864	hsa-miR-196b-5p	hsa-miR-196a-5p	hsa-miR-651-3p	hsa-miR-103a-2-5p	hsa-miR-136-5p
ASCRP3009585	0.018072	0.371177	2.70543	up	hsa_circRNA_400244		25242744	chr1	-	58999624	59000003	exonic	NM_145243	OMA1	GGCCATGAAATAGCACATGCAGTACTTGGGCATGCTTGGATGGAAGAATTTAAAAATGAT	600.875	85	8.70967	7.27381	219.5	150	1027.5	1006.5	83.5	109	73.5	74	8.00941	7.94268	9.46842	9.41817	7.1451	7.68504	7.13487	7.13023	hsa-miR-2110	hsa-miR-6835-3p	hsa-miR-138-2-3p	hsa-miR-495-3p	hsa-miR-6807-3p
ASCRP3012305	0.0202553	0.371177	2.70258	up	hsa_circRNA_100830	hsa_circ_0002058	circBase	chr11	+	61133516	61135470	exonic	NM_016464	TMEM138	TGGACAGATGGACTTCAAATGCTGTTTGTATTCCAGAGACTAGCATCCAGGATATTGCAG	463.125	59.75	8.36351	6.92917	192	92	758	810.5	60.5	83.5	48	47	7.87775	7.3797	9.05415	9.14242	6.8038	7.34236	6.79635	6.77417	hsa-miR-204-5p	hsa-miR-7-5p	hsa-miR-380-5p	hsa-miR-377-5p	hsa-miR-211-5p
ASCRP3007330	0.00941003	0.371177	2.70199	up	hsa_circRNA_100243	hsa_circ_0000073	circBase	chr1	-	58992932	59002413	exonic	NM_145243	OMA1	GAAAATTGGAGGCCGAAGCTGACAAAATTGGACTACTGCTTGCTGCAAAGGGGCATAAGG	650.875	99.875	8.88161	7.44759	257	211.5	1076	1059	103.5	118	90	88	8.16114	8.35331	9.51482	9.49719	7.40937	7.79323	7.30378	7.28399	hsa-miR-606	hsa-miR-145-5p	hsa-miR-153-5p	hsa-miR-302d-5p	hsa-miR-302b-5p
ASCRP3002053	0.029057	0.371177	2.68696	up	hsa_circRNA_103654	hsa_circ_0001417	circBase	chr4	-	73950965	73958017	exonic	NM_032217	ANKRD17	AGCATCAAATGGGGTGGCACTGAATCAACAAGACAAGCAACTCAATTGATTAATGCTTTG	648.375	93.75	8.7842	7.35823	240.5	151	1117	1085	75.5	142.5	80	77	8.11049	7.92685	9.57424	9.52523	7.05076	8.04309	7.18038	7.15868	hsa-miR-298	hsa-miR-766-5p	hsa-miR-323a-5p	hsa-miR-138-5p	hsa-miR-486-3p
ASCRP3009414	0.0369009	0.371177	2.68016	up	hsa_circRNA_103503	hsa_circ_0001965	circBase	chr3	-	169854206	169863309	exonic	NM_024947	PHC3	GGACATCAAGTATTCACCAGTTAATAGCACCAGCTGATTTTCACACCCGCTACCACTGTG	3213.38	568.875	11.0285	9.60621	1006.5	1451.5	5144.5	5251	424	703.5	567	581	9.7227	11.138	11.621	11.6323	9.47541	10.4423	9.23053	9.27659	hsa-miR-582-3p	hsa-miR-542-3p	hsa-miR-655-3p	hsa-miR-206	hsa-let-7g-3p
ASCRP3007816	0.03141	0.371177	2.67511	up	hsa_circRNA_102725	hsa_circ_0004435	circBase	chr2	-	58425728	58459247	exonic	NM_018062	FANCL	GACACCTCAGGGAAGAGACTTCCACCTTAGGATAGTGTTGCCTGAAGATTTACAACTGAA	737.125	105.25	8.93486	7.51527	230	177	1301.5	1240	93	130.5	95.5	102	8.05303	8.12733	9.82098	9.73812	7.31834	7.9323	7.38684	7.42359	hsa-miR-302b-5p	hsa-miR-26a-1-3p	hsa-miR-22-3p	hsa-miR-765	hsa-miR-891b
ASCRP3004915	0.0312321	0.371177	2.65899	up	hsa_circRNA_054673	hsa_circ_0054673	circBase	chr2	-	58425728	58449177	exonic	NM_018062	FANCL	CATTTTGTGCCTCCTGGACACCTCAGGAAGTTGCCTTAAAGAATAGACAAGAGCTGTATG	642.125	87.875	8.72675	7.31587	215	131.5	1106.5	1115.5	97.5	108	69	77	7.97647	7.80062	9.55566	9.57424	7.37753	7.67296	7.0543	7.15868	hsa-miR-302b-5p	hsa-miR-8062	hsa-miR-4698	hsa-miR-4700-5p	hsa-miR-4667-5p
ASCRP3012162	0.0445963	0.371177	2.63914	up	hsa_circRNA_104492	hsa_circ_0001747	circBase	chr7	+	131071878	131084192	exonic	NM_013255	MKLN1	TGCGAAGAGTTGATTGAAAAGGCTGTAAATGTACTTGATTCTAAAGCTCGAAAGGCCTGC	352	31.875	7.85687	6.45681	76	54	630	648	38	38	25	26.5	6.98573	6.82736	8.78783	8.82657	6.41488	6.63463	6.35418	6.42353	hsa-miR-616-5p	hsa-miR-30d-3p	hsa-miR-320b	hsa-miR-320a	hsa-miR-302c-5p
ASCRP3001311	0.0013523	0.333418	2.62873	up	hsa_circRNA_100889	hsa_circ_0007458	circBase	chr11	+	76174864	76183884	exonic	NM_020193	C11orf30	ACCATCTGTGGTCATGTCAACAGTAGCACAAGGTGTAAGCTGTTCAGATGAAGATGAAAA	676.375	144	9.17684	7.78247	565	372.5	891	877	78	161.5	164.5	172	9.05966	9.15145	9.26023	9.23601	7.08693	8.22482	7.8806	7.93754	hsa-miR-27b-5p	hsa-miR-877-5p	hsa-miR-140-3p	hsa-miR-216a-3p	hsa-miR-299-3p
ASCRP3009489	0.00601135	0.371177	2.62188	up	hsa_circRNA_104804	hsa_circ_0001865	circBase	chr9	-	86292641	86293514	exonic	NM_013438	UBQLN1	GGAGTAGGAGACGTTGGAACTTGCCAGGAATCCAGCAATGATGCAGGAGATGATGAGGAA	428.375	64.75	8.41041	7.01981	141	196	689.5	687	81	69	54	55	7.54788	8.25644	8.92425	8.91308	7.11298	7.17339	6.88379	6.90909	hsa-miR-199b-3p	hsa-miR-199a-3p	hsa-miR-449a	hsa-miR-449b-5p	hsa-miR-556-3p
ASCRP3001540	0.0161938	0.371177	2.60991	up	hsa_circRNA_104810	hsa_circ_0005142	circBase	chr9	-	86297865	86301070	exonic	NM_013438	UBQLN1	ACTCTACATCTGGTTCTGCTACTAGCAACCCTTTTGGTTTAGTTTAAGGAAGAAATCTCT	426.75	61.625	8.34953	6.96553	120	176	703.5	707.5	88	79	39	40.5	7.36367	8.14198	8.95379	8.93866	7.22209	7.31341	6.64656	6.68004	hsa-miR-624-3p	hsa-miR-223-5p	hsa-miR-449c-3p	hsa-miR-802	hsa-miR-545-3p
ASCRP3005595	0.0430918	0.371177	2.58947	up	hsa_circRNA_104533	hsa_circ_0083092	circBase	chr7	+	155471301	155473602	exonic	NM_053043	RBM33	CGAGATCAATGAACCTTTAGATGAATTTACAAATCAGTCGGATTTGTCAGATGAAGAGCT	509.5	63.625	8.36981	6.99715	171	78	904	885	72	70.5	56	56	7.77033	7.16832	9.28982	9.25078	6.98857	7.14842	6.9273	6.92433	hsa-miR-578	hsa-miR-125b-5p	hsa-miR-26b-3p	hsa-miR-512-5p	hsa-miR-335-3p
ASCRP3001012	0.0124462	0.371177	2.58501	up	hsa_circRNA_104807	hsa_circ_0001866	circBase	chr9	-	86293355	86297981	exonic	NM_013438	UBQLN1	ACAAGAGCAGGCCTCAGGATCATTCAGCTCAGCAAACAAATACAGCTGGAAGCAATGTTA	453	72.5	8.4824	7.11222	139	225	716	732	75	105	53	57	7.52059	8.43236	8.97495	9.00167	7.01436	7.6334	6.86408	6.93705	hsa-miR-296-3p	hsa-miR-218-1-3p	hsa-miR-876-5p	hsa-miR-345-5p	hsa-miR-423-3p
ASCRP3007349	0.0213523	0.371177	2.51996	up	hsa_circRNA_102683	hsa_circ_0007386	circBase	chr2	+	36668400	36669878	exonic	NM_016441	CRIM1	GAAACTCAAGTCAGACTAACTGCAGATGGTTGCTGTACTTTGCCAACAAGAAGAGAAGCC	480.625	74.625	8.47143	7.13803	260.5	108	777	777	96	108.5	47	47	8.19555	7.54488	9.07867	9.06661	7.34236	7.65811	6.76117	6.79049	hsa-miR-146b-5p	hsa-miR-146a-5p	hsa-miR-383-3p	hsa-miR-17-3p	hsa-miR-29b-1-5p
ASCRP3010742	0.0212204	0.371177	2.47776	up	hsa_circRNA_100267	hsa_circ_0002570	circBase	chr1	+	78267015	78280916	exonic	NM_198549	FAM73A	TACCCTTGGGGCATCTGATCCTAATTCCCTTGCTGATGATATTGATCAAATTTTCTCCGG	485.375	78.5	8.49981	7.19078	171	157.5	802	811	112	102	47	53	7.73192	8.00158	9.12839	9.13736	7.51764	7.57161	6.79635	6.87751	hsa-miR-514a-5p	hsa-miR-518c-5p	hsa-miR-144-5p	hsa-miR-889-3p	hsa-miR-501-5p
ASCRP3009678	0.0483434	0.371177	2.47668	up	hsa_circRNA_100134	hsa_circ_0000044	circBase	chr1	-	31465236	31479949	exonic	NM_014676	PUM1	GGGACTTTTTGACTACAATTCTCAACAACAGCAGCTCTTGCCAGGTAAAAAGTTTTGGGA	380.125	46	7.99357	6.68517	103.5	61	669	687	63	50	35	36	7.24406	6.93705	8.88437	8.90881	6.8427	6.74763	6.58894	6.5614	hsa-miR-767-5p	hsa-miR-632	hsa-miR-590-5p	hsa-miR-330-5p	hsa-miR-885-5p
ASCRP3001967	0.0360509	0.371177	2.47651	up	hsa_circRNA_092573	hsa_circ_0002117	circBase	chr7	+	131071878	131073731	exonic	NM_013255	MKLN1	AGATGTTCCCTTGTCGATTCATTAAAATAGTACTTGATTCTAAAGCTCGAAAGGCCTGCT	639.125	99.5	8.73474	7.42643	186	148	1120.5	1102	114	92	91	101	7.8507	7.94268	9.58602	9.55956	7.52266	7.47302	7.31665	7.39341	hsa-miR-8066	hsa-miR-590-3p	hsa-miR-4638-3p	hsa-miR-548u	hsa-miR-6750-5p
ASCRP3003788	0.0381809	0.371177	2.46744	up	hsa_circRNA_104062	hsa_circ_0001578	circBase	chr6	-	13639794	13644961	exonic	NM_005493	RANBP9	CAATTTAGCATCAGGCAAAGGAAGCACCGCACATTTTTCAGCCAAATTTGTATCCTACTG	424.5	56.5	8.17849	6.87548	108	93	747	750	63	58	54	51	7.28602	7.36859	9.03395	9.02541	6.8427	6.93705	6.88379	6.83837	hsa-miR-376c-5p	hsa-miR-376b-5p	hsa-miR-150-5p	hsa-miR-891a-3p	hsa-miR-135b-5p
ASCRP3003360	0.0244343	0.371177	2.46642	up	hsa_circRNA_079926	hsa_circ_0079926	circBase	chr7	+	39821342	39829143	exonic	NR_026999	LINC00265	ATTTGGAATTTTCCTATACGTGGATTCCAGAGGGGTGACAGCGAAACTTGAAGCATATGT	684.125	124.5	8.96441	7.66199	318	208	1100.5	1110	126	192	91	89	8.4137	8.32445	9.55124	9.56824	7.67296	8.41545	7.29691	7.26263	hsa-miR-1273h-5p	hsa-miR-6774-5p	hsa-miR-17-3p	hsa-miR-3689c	hsa-miR-3689b-3p
ASCRP3000725	0.0461558	0.371177	2.46415	up	hsa_circRNA_103655	hsa_circ_0007883	circBase	chr4	-	73956383	73958017	exonic	NM_032217	ANKRD17	AAGTCCCTCAGGGGTGGCACTGAATCAACAAGACAAGCAACTCAATTGATTAATGCTTTG	615.75	102.25	8.73434	7.43325	219	152	1043	1049	83	172	78	76	8.01682	7.94687	9.48927	9.48441	7.12267	8.28443	7.17496	7.15096	hsa-miR-766-5p	hsa-miR-298	hsa-miR-323a-5p	hsa-miR-138-5p	hsa-miR-486-3p
ASCRP3001957	0.0331958	0.371177	2.43789	up	hsa_circRNA_103128	hsa_circ_0061694	circBase	chr21	+	38792600	38868560	exonic	NM_101395	DYRK1A	AGATGGCACTTGGAACTTAAAGAAGACCAAAGATGGAAAACGGTGTTATAGTTTTGCCGC	374.875	49	8.05515	6.76952	105.5	84	653.5	656.5	53	65	39	39	7.26381	7.26745	8.8402	8.84912	6.68655	7.07413	6.68004	6.63735	hsa-miR-516b-5p	hsa-miR-578	hsa-miR-329-5p	hsa-miR-450b-5p	hsa-miR-129-5p
ASCRP3004024	0.00581575	0.371177	2.43788	up	hsa_circRNA_104812	hsa_circ_0007351	circBase	chr9	-	88307603	88327481	exonic	NM_015239	AGTPBP1	CACTGCCCGATATGTTACATCAAAAATTCTTCATCTGGCTCAGAGTCAAGATTATCTGCA	407.625	66.75	8.32836	7.04274	201	124.5	647	658	81	71	56	59	7.91907	7.70587	8.8335	8.85503	7.13999	7.15647	6.89763	6.97686	hsa-miR-145-5p	hsa-miR-34a-5p	hsa-miR-449b-5p	hsa-miR-449a	hsa-miR-219a-1-3p
ASCRP3001705	0.0112505	0.371177	2.43535	up	hsa_circRNA_101044	hsa_circ_0025905	circBase	chr12	+	42768664	42768876	exonic	NM_016488	PPHLN1	AGAAAGGAGCAAATCATACTCTTTCCATCAGTCTCAACATAGAAGGACATGAGAGATGGC	359.875	57.375	8.18173	6.8976	424	79.5	461.5	474.5	55	76.5	45	53	8.74257	7.20665	8.3725	8.4052	6.72954	7.23827	6.74511	6.87751	hsa-miR-518c-5p	hsa-miR-147a	hsa-miR-500a-5p	hsa-miR-501-5p	hsa-miR-125a-3p
ASCRP3009803	0.0358705	0.371177	2.40071	up	hsa_circRNA_102737	hsa_circ_0001017	circBase	chr2	-	61749745	61761038	exonic	NM_003400	XPO1	GGTGGAAGATTCTTCCAAGGAACCAGTGCGAAGTAATCTATGCCAGCAATTATGACAATG	503.375	78.375	8.46669	7.20323	122	159.5	872	860	102	82	68	61.5	7.39394	8.01613	9.23903	9.21767	7.42149	7.33012	7.0641	6.99722	hsa-miR-221-3p	hsa-miR-599	hsa-miR-145-5p	hsa-miR-23a-3p	hsa-miR-197-3p
ASCRP3010151	0.0482561	0.371177	2.39912	up	hsa_circRNA_102829	hsa_circ_0001072	circBase	chr2	-	144966169	144969146	exonic	NM_024659	GTDC1	GTGAGCATTACAGATTGTGCTTCAAGAAGACCATAGGGAAGAACGCATTTTCATCTTGCT	379.875	52.5	8.0719	6.8094	107	82.5	670	660	46.5	90.5	37	36	7.28602	7.24822	8.8934	8.85998	6.58359	7.44219	6.62917	6.58265	hsa-miR-1185-5p	hsa-miR-761	hsa-miR-340-5p	hsa-miR-607	hsa-miR-539-5p
ASCRP3002726	0.0295534	0.371177	2.39871	up	hsa_circRNA_007211	hsa_circ_0007211	circBase	chr1	-	674213	678730	sense overlapping	uc001abm.2	AK310751	ATATTTGGAATTTTCGTATACGTGGATTCCAGAGGGGTGACAGCAAAACCTGGATCTACC	767.875	146	9.12127	7.85901	374.5	222	1230	1245	155	216	108	105	8.58842	8.42828	9.7227	9.74569	7.95614	8.5756	7.46056	7.44375	hsa-miR-1273h-5p	hsa-miR-1285-3p	hsa-miR-6779-5p	hsa-miR-6780a-5p	hsa-miR-30b-3p
ASCRP3003637	0.0340317	0.371177	2.39095	up	hsa_circRNA_102307	hsa_circ_0000830	circBase	chr18	+	12999419	13008630	exonic	NM_032142	CEP192	CAAGATCTCTTCAACAGGGCTTCACCACTGGAACAAGCACAAGTGAGATGGAAGATTTTC	379	53.625	8.1002	6.84262	85	110	664	657	69	62	44	39.5	7.08906	7.57928	8.88021	8.85225	6.93705	7.00827	6.74511	6.68004	hsa-miR-384	hsa-miR-146b-3p	hsa-miR-136-5p	hsa-miR-452-5p	hsa-miR-144-5p
ASCRP3000821	0.0254968	0.371177	2.37812	up	hsa_circRNA_082178	hsa_circ_0082178	circBase	chr7	+	128281294	128289036	exonic	NR_024368	LINC01000	AATATTTGGAATTTTCGTATACGTGGATTCCAGAGGGGTGACAGTGAAACAAGCACCTGT	728.5	137.25	9.043	7.79318	360.5	206	1183.5	1164	139.5	197.5	105	107	8.5483	8.32851	9.65238	9.6428	7.81777	8.44902	7.44115	7.46476	hsa-miR-1273h-5p	hsa-miR-3689c	hsa-miR-3689b-3p	hsa-miR-30b-3p	hsa-miR-1273g-5p
ASCRP3000585	0.040591	0.371177	2.37051	up	hsa_circRNA_102726	hsa_circ_0001009	circBase	chr2	-	58449076	58459247	exonic	NM_018062	FANCL	AAGAGATAGGAACTCTTGGTTGGGATAAGGAAGAGACTTCCACCTTAGGATAGTGTTGCC	466.875	71.5	8.33138	7.08618	145.5	98	818	806	72	90	62	62	7.58935	7.46056	9.14969	9.1259	6.9668	7.40964	6.99141	6.97686	hsa-miR-26a-1-3p	hsa-miR-22-3p	hsa-miR-765	hsa-miR-891b	hsa-miR-503-3p
ASCRP3002184	0.0254412	0.371177	2.36795	up	hsa_circRNA_103427	hsa_circ_0001324	circBase	chr3	+	107429298	107435696	exonic	NM_020235	BBX	AGGAAAAGCAGAAATACACAGACATGGCCAAGGAGGTCACAGTAATGAAAGGCAGTAATA	365.125	58.25	8.14098	6.89735	100.5	137	601	622	51	90.5	44	47.5	7.22028	7.84308	8.73069	8.76988	6.62917	7.46604	6.69702	6.79716	hsa-miR-877-3p	hsa-miR-34a-3p	hsa-miR-1468-3p	hsa-miR-661	hsa-miR-1301-5p
ASCRP3000822	0.0267247	0.371177	2.35492	up	hsa_circRNA_017202	hsa_circ_0017202	circBase	chr1	-	243222779	243242354	exonic	NR_029401	LINC01347	AATATTTGGAATTTTTGTATACGTGGATTCCAGAGGGGTGACAGCGAAACCTGGACCTAC	678.75	129.375	8.9631	7.72742	339	201	1077	1098	137	194	89.5	97	8.492	8.28969	9.51946	9.55124	7.80466	8.43757	7.30378	7.36367	hsa-miR-1273h-5p	hsa-miR-1304-5p	hsa-miR-6884-5p	hsa-miR-17-3p	hsa-miR-3689c
ASCRP3009134	0.0153863	0.371177	2.35327	up	hsa_circRNA_104490	hsa_circ_0001746	circBase	chr7	+	131060182	131084192	exonic	NM_013255	MKLN1	GCGAAGAGTTGATTGAAAAGGCTGTAAATGGAACATTTTAGTGGACAAACCAAATGACCA	252.25	32.125	7.6566	6.42194	94	59	419	437	40	38	25	25.5	7.15995	6.90442	8.26005	8.30201	6.44814	6.55757	6.37976	6.30228	hsa-miR-616-5p	hsa-miR-30d-3p	hsa-miR-320b	hsa-miR-320a	hsa-miR-302c-5p
ASCRP3002395	0.00840513	0.371177	2.34146	up	hsa_circRNA_104346	hsa_circ_0001696	circBase	chr7	-	35707043	35712888	exonic	NM_022373	HERPUD2	AGTCACCAGTTTCCATATGTAATGCAAGGTTGACGAAGGATCAGAGATTGGTGTATTCGG	467.75	89.625	8.51665	7.28924	187	175.5	754.5	754	83	99	88.5	88	7.8507	8.13904	9.0468	9.03007	7.13023	7.52767	7.25662	7.24244	hsa-miR-2113	hsa-miR-218-5p	hsa-miR-636	hsa-miR-346	hsa-miR-511-5p
ASCRP3011087	0.0257964	0.371177	2.33818	up	hsa_circRNA_005921	hsa_circ_0005921	circBase	chr7	+	128281256	128289036	sense overlapping	NR_024368	LINC01000	TATTTGGAATTTTCGTATACGTGGATTCCAGAGGGGTGACAGTGAAACGCTACCACATAC	704.75	136	9.00974	7.78435	359	197	1131	1132	138	195.5	106.5	104	8.5483	8.28969	9.59925	9.60172	7.80466	8.43438	7.47479	7.42359	hsa-miR-30b-3p	hsa-miR-1273h-5p	hsa-miR-619-5p	hsa-miR-1285-3p	hsa-miR-6779-5p
ASCRP3007780	0.0337939	0.371177	2.32718	up	hsa_circRNA_104474	hsa_circ_0082179	circBase	chr7	+	128282270	128289036	exonic	NR_024368	LINC01000	GAATTTTCGTATACGTGGATTCCAGAGGGGTGACAGTGAAACCTGGATCTACCATGAAAG	841	165.75	9.2473	8.02871	417	237	1344	1366	174.5	233	129.5	126	8.73392	8.49288	9.86759	9.8948	8.13952	8.68582	7.6522	7.63731	hsa-miR-30b-3p	hsa-miR-512-5p	hsa-miR-20b-3p	hsa-miR-377-5p	hsa-miR-345-3p
ASCRP3000820	0.028251	0.371177	2.31364	up	hsa_circRNA_018224	hsa_circ_0018224	circBase	chr10	+	38724057	38734535	exonic	NR_024497	LINC00999	AATATTTGGAATTTTCGTATACGTGGATTCCAGAGGGGTGACAGCAAAACAAACAGGACC	734.5	145.5	9.06904	7.85888	374	221	1141	1202	155	211.5	110	105.5	8.5844	8.40061	9.60888	9.68228	7.96867	8.53421	7.48888	7.44375	hsa-miR-1273h-5p	hsa-miR-6884-5p	hsa-miR-3689b-3p	hsa-miR-3689c	hsa-miR-6086
ASCRP3013516	0.0413209	0.371177	2.30767	up	hsa_circRNA_102524	hsa_circ_0050516	circBase	chr19	+	34922765	34936026	exonic	NM_005499	UBA2	TTTTACCAAGGTTGCCAAGGAAAGTGTACTGCAGTTTTACCCGAAAGCTAATATCGTTGC	316	41.875	7.83239	6.62596	74	72	558	560	40	45.5	42	40	6.96087	7.10238	8.63664	8.62969	6.48124	6.72954	6.65572	6.63735	hsa-miR-597-3p	hsa-miR-29b-2-5p	hsa-miR-34b-5p	hsa-miR-486-3p	hsa-miR-582-3p
ASCRP3009451	0.0340337	0.371177	2.29888	up	hsa_circRNA_101245	hsa_circ_0000471	circBase	chr13	-	33091993	33101669	exonic	NM_033111	N4BP2L2	GGAGACAGAGAATTCTGCTTGGTCAGAATCGTGATGGCATTGTGTTCAGCACTGATGACT	1523	383.875	10.2701	9.06917	617	1337	2007	2131	310	440.5	389	396	9.16678	11.0401	10.4034	10.4701	9.00405	9.63381	8.80168	8.83715	hsa-miR-135a-5p	hsa-miR-218-1-3p	hsa-miR-135b-5p	hsa-miR-329-3p	hsa-miR-618
ASCRP3000419	0.0312986	0.371177	2.29694	up	hsa_circRNA_009181	hsa_circ_0009181	circBase	chr1	-	667396	678730	exonic	uc002khh.3	LOC100133331	AACATTTGGAATTTTCGTATACGTGGATTCTAGAGGGGTGACAGCGAAACCTGGATCTAC	755.625	148.375	9.10028	7.90056	383	217	1193.5	1229	163	211	113.5	106	8.61313	8.38884	9.67564	9.72351	8.05387	8.53864	7.53216	7.47758	hsa-miR-485-5p	hsa-miR-30b-3p	hsa-miR-6884-5p	hsa-miR-3689c	hsa-miR-3689b-3p
ASCRP3001912	0.0111581	0.371177	2.28806	up	hsa_circRNA_104809	hsa_circ_0001867	circBase	chr9	-	86294689	86297981	exonic	NM_013438	UBQLN1	AGATATAATGAGACAAGCCTCAGGATCATTCAGCTCAGCAAACAAATACAGCTGGAAGCA	354	65	8.19667	7.00254	116	180.5	558.5	561	65	86.5	51.5	57	7.35024	8.15855	8.6446	8.63329	6.86098	7.38899	6.86408	6.89611	hsa-miR-296-3p	hsa-miR-876-5p	hsa-miR-345-5p	hsa-miR-205-3p	hsa-miR-449c-3p
ASCRP3008786	0.0458346	0.371177	2.27117	up	hsa_circRNA_103653	hsa_circ_0006693	circBase	chr4	-	73944358	73958017	exonic	NM_032217	ANKRD17	GATTGGTGGCAATCAAGGGGTGGCACTGAATCAACAAGACAAGCAACTCAATTGATTAAT	442	74.875	8.31822	7.13479	162	108	743	755	58	119	64	58.5	7.68438	7.53265	9.02203	9.03384	6.77968	7.81119	7.01714	6.93115	hsa-miR-298	hsa-miR-486-3p	hsa-miR-766-5p	hsa-miR-323a-5p	hsa-miR-138-5p
ASCRP3008457	0.0358455	0.371177	2.26416	up	hsa_circRNA_102521	hsa_circ_0050514	circBase	chr19	+	34922765	34924317	exonic	NM_005499	UBA2	GATAACAGAGGTTGCCAAGGAAAGTGTACTGCAGTTTTACCCGAAAGCTAATATCGTTGC	351.125	52.875	7.98873	6.80975	96	86	609.5	613	53	55	50	53.5	7.18703	7.28573	8.74184	8.74031	6.66305	6.86021	6.85788	6.85788	hsa-miR-433-3p	hsa-miR-215-3p	hsa-miR-34b-5p	hsa-miR-23b-3p	hsa-miR-891a-5p
ASCRP3009138	0.0477721	0.371177	2.25113	up	hsa_circRNA_100132	hsa_circ_0002452	circBase	chr1	-	31452908	31468067	exonic	NM_014676	PUM1	GCGACACTAGGGCCCAAGGGATGCAGACAGTGATGAAAACGACAAAGGTGAAAAGAAGAA	280	36.5	7.66115	6.4905	71	52	496.5	500.5	47	42	27	30	6.93115	6.77622	8.45884	8.47839	6.59148	6.59661	6.31753	6.45638	hsa-miR-646	hsa-miR-93-3p	hsa-miR-450a-2-3p	hsa-miR-615-5p	hsa-miR-503-5p
ASCRP3007674	0.00914718	0.371177	2.23962	up	hsa_circRNA_100548	hsa_circ_0000213	circBase	chr10	-	12039670	12056183	exonic	NM_015542	UPF2	GAAGTTGGTACGGGCACTCTTCATAGTTCCTAGACAAAGGCGCATTCTACATTCTAAAGG	325.25	56.5	8.03699	6.87374	123	115	526.5	536.5	63	49	56	58	7.40619	7.62226	8.54942	8.5701	6.86098	6.76963	6.9273	6.93705	hsa-miR-670-3p	hsa-miR-376a-5p	hsa-miR-141-5p	hsa-miR-335-3p	hsa-miR-597-3p
ASCRP3009490	0.0119257	0.371177	2.22865	up	hsa_circRNA_104805	hsa_circ_0006466	circBase	chr9	-	86292641	86297981	exonic	NM_013438	UBQLN1	GGAGTAGGAGGCCTCAGGATCATTCAGCTCAGCAAACAAATACAGCTGGAAGCAATGTTA	297.625	53.5	7.97584	6.81967	96	148	473.5	473	57	79	40	38	7.17914	7.91664	8.4055	8.40208	6.73903	7.25603	6.66305	6.62056	hsa-miR-296-3p	hsa-miR-199a-3p	hsa-miR-199b-3p	hsa-miR-449a	hsa-miR-449b-5p
ASCRP3009335	0.0270972	0.371177	2.18982	up	hsa_circRNA_103253	hsa_circ_0001246	circBase	chr22	+	46096161	46136418	exonic	NM_013236	ATXN10	GGAAATCTGTGTTACAAGAATAAAGATAACCAAGACAAGCTTTTCGCTGTGGCCTGCAGT	352.875	63.25	8.10909	6.97827	106	125.5	588	592	95.5	72.5	42	43	7.28602	7.74394	8.69962	8.70678	7.3241	7.16637	6.68004	6.74258	hsa-miR-204-3p	hsa-miR-130b-5p	hsa-miR-501-3p	hsa-miR-660-5p	hsa-miR-502-3p
ASCRP3005771	0.0256628	0.371177	2.17911	up	hsa_circRNA_102389	hsa_circ_0001993	circBase	chr18	+	74561481	74583781	exonic	NM_007345	ZNF236	CGTTTCAAAAGCCAAGCCAGTTAACGCGACACATTAGGATACACACAGATGGAGTTTTAA	448.625	106.125	8.50447	7.38073	154	238	705.5	697	75.5	59	144	146	7.63826	8.49821	8.95247	8.92893	7.02839	6.95273	7.76859	7.77322	hsa-miR-514a-5p	hsa-miR-218-5p	hsa-miR-589-3p	hsa-miR-23b-5p	hsa-miR-151a-5p
ASCRP3011766	0.0183551	0.371177	2.15652	up	hsa_circRNA_029937	hsa_circ_0029937	circBase	chr13	-	33095509	33111164	exonic	NM_014887	N4BP2L2	TGAACCTGAAACTTGGTGGAAATTTGATCCTGAAGAATTAGAAAAATGTCTTATGGTGAA	1528.38	439.75	10.2669	9.15816	704	1104.5	2158	2147	401	280	535	543	9.30154	10.8164	10.4701	10.4794	9.38671	8.91672	9.15684	9.17238	hsa-miR-26b-3p	hsa-miR-135a-5p	hsa-miR-7107-3p	hsa-miR-135b-5p	hsa-miR-6780a-3p
ASCRP3001470	0.00717178	0.371177	2.15605	up	hsa_circRNA_007448	hsa_circ_0007448	circBase	chr10	-	12039670	12046726	exonic	NM_015542	UPF2	ACGGGCACTCTTCATAGTTCCTAGACAAAGAACATGGGCCTGGAATTGATATATTCACAC	322.5	61.5	8.05149	6.9431	142	118	501	529	65.5	49.5	65	66	7.54788	7.62226	8.48044	8.55539	6.89005	6.78804	7.0543	7.04003	hsa-miR-376a-5p	hsa-miR-141-5p	hsa-miR-4423-5p	hsa-miR-6844	hsa-miR-597-3p
ASCRP3007815	0.0442962	0.371177	2.15305	up	hsa_circRNA_102724	hsa_circ_0054672	circBase	chr2	-	58425728	58431361	exonic	NM_018062	FANCL	GACACCTCAGACTTGTGTATGCGGATACCTGCTTCAGTACCATCAAGTTAAAAGCAGAAG	372.625	63	8.092	6.98562	133	86	633.5	638	70.5	88.5	46	47	7.48021	7.29248	8.79597	8.79933	6.97471	7.4161	6.76117	6.79049	hsa-miR-302b-5p	hsa-miR-548b-5p	hsa-miR-520c-3p	hsa-miR-548d-5p	hsa-miR-520b
ASCRP3001051	0.045461	0.371177	2.13993	up	hsa_circRNA_102658	hsa_circ_0007385	circBase	chr2	-	32142994	32157204	exonic	NM_015955	MEMO1	ACACAGTATTGAAATGCATTTGCCTTATACAGCTAAAGCCATGGAAAGCCATGCAGGATA	352.75	60.25	8.02846	6.9309	109	94	597	611	65	88	43	45	7.28602	7.37361	8.72031	8.73392	6.88133	7.40964	6.69005	6.74258	hsa-miR-485-3p	hsa-miR-519c-3p	hsa-miR-423-5p	hsa-miR-20b-5p	hsa-miR-105-5p
ASCRP3012567	0.0380949	0.371177	2.12661	up	hsa_circRNA_102678	hsa_circ_0002346	circBase	chr2	+	36623756	36669878	exonic	NM_016441	CRIM1	TGTACTTTGCCAACAAGATGAGAACTGGACTGATGACCAACTGCTTGGTTTTAAACCATG	308.25	53	7.90265	6.8141	146	64	522	501	65	77	35	35	7.5855	6.99792	8.54372	8.48347	6.89763	7.26862	6.56827	6.52187	hsa-miR-146b-5p	hsa-miR-146a-5p	hsa-miR-383-3p	hsa-miR-17-3p	hsa-miR-329-5p
ASCRP3010602	0.0193279	0.371177	2.12044	up	hsa_circRNA_069714	hsa_circ_0069714	circBase	chr4	+	52729602	52729673	exonic	NM_015115	DCUN1D4	TAAGATCTACCACACCCTTAATAAGCTGATTTTCAGCTGAACTCTCATCTCTCAACACTG	667.375	145.25	8.97134	7.88698	594.5	168	946	961	153	169	129	130	9.12028	8.05995	9.34681	9.35832	7.95125	8.27821	7.66034	7.65811	hsa-miR-7161-3p	hsa-miR-4536-5p	hsa-miR-3145-3p	hsa-miR-6766-5p	hsa-miR-4455
ASCRP3002640	0.0452563	0.371177	2.11968	up	hsa_circRNA_104645	hsa_circ_0001811	circBase	chr8	-	74585341	74601048	exonic	NM_014393	STAU2	ATAGAGCTAATTACAACTTTCGGGGCATGTACAATCAGAGATGTTCTCAGTGCAGCTGAG	400.375	78.375	8.25409	7.17024	144.5	124	677	656	117	103	46.5	47	7.58127	7.69126	8.90294	8.84089	7.56924	7.59786	6.77128	6.74258	hsa-miR-450a-1-3p	hsa-miR-654-3p	hsa-miR-103a-2-5p	hsa-miR-484	hsa-miR-657
ASCRP3011234	0.0104781	0.371177	2.11902	up	hsa_circRNA_101806	hsa_circ_0000698	circBase	chr16	+	47531309	47549512	exonic	NM_000293	PHKB	TCAGGACTCCAGATTATCTACAACACTGATGAGGCTCAGTTTATGAACCTCTTAAAAGCA	343.25	70.5	8.15101	7.06761	139	136	551.5	546.5	97	74	57	54	7.54788	7.83187	8.62579	8.5985	7.34236	7.16637	6.89763	6.86408	hsa-miR-586	hsa-miR-675-3p	hsa-miR-15a-5p	hsa-miR-759	hsa-miR-526b-5p
ASCRP3006022	0.0327559	0.371177	2.11711	up	hsa_circRNA_070355	hsa_circ_0070355	circBase	chr4	+	87593517	87614827	exonic	NM_006264	PTPN13	CTATTCGAGATCGATTGCGAGGAAAAGGATTACCAACAGTAAGCCTAGCTGATCCTGCTG	228.625	31.25	7.50647	6.42438	66	52.5	392	404	38	34	26	27	6.89687	6.76549	8.1686	8.19494	6.42668	6.48346	6.35418	6.43317	hsa-miR-452-3p	hsa-miR-7641	hsa-miR-6878-5p	hsa-miR-5093	hsa-miR-3118
ASCRP3011612	0.00660907	0.371177	2.10116	up	hsa_circRNA_006893	hsa_circ_0006893	circBase	chr3	-	169831147	169840532	exonic	NM_024947	PHC3	TCTGACACAGAGATGGAAGACATGATTGCTGAAGGTTTATCAGGTAGAAGATGTGTGTGA	338	69.5	8.12792	7.05674	160	122	546	524	71	76	63	68	7.67075	7.68679	8.60682	8.54734	7.00074	7.1861	6.99141	7.04871	hsa-miR-8082	hsa-miR-583	hsa-miR-513a-5p	hsa-miR-26b-3p	hsa-miR-608
ASCRP3001897	0.0280419	0.371177	2.09816	up	hsa_circRNA_003357	hsa_circ_0003357	circBase	chr10	+	111883774	111890244	exonic	NM_001121	ADD3	AGAGTATAAGAGGACAATCGAACGTAAACAACAAGGCCTAGAAGGGGTATAGAACAGGCT	261.125	45.375	7.72397	6.65484	107	70	437	430.5	56	68.5	30	27	7.28097	7.03626	8.30236	8.27629	6.72954	7.10238	6.42668	6.36078	hsa-miR-5092	hsa-miR-6809-3p	hsa-miR-924	hsa-miR-6858-5p	hsa-miR-29b-1-5p
ASCRP3002343	0.00712027	0.371177	2.09637	up	hsa_circRNA_103636	hsa_circ_0001410	circBase	chr4	+	52729602	52744020	exonic	NM_015115	DCUN1D4	AGGTGCTTGGAATGGTTCTATGAATATGCAGATTTTCAGCTGAACTCTCATCTCTCAACA	412.75	88.375	8.38006	7.31217	308	122	597.5	623.5	96	100	80	77.5	8.37359	7.66755	8.7186	8.76051	7.34236	7.54271	7.19334	7.17027	hsa-miR-520a-5p	hsa-miR-617	hsa-miR-15b-3p	hsa-miR-890	hsa-miR-103a-2-5p
ASCRP3012100	0.0296574	0.371177	2.07753	up	hsa_circRNA_005684	hsa_circ_0005684	circBase	chr9	+	19286766	19305525	exonic	NM_017925	DENND4C	TGCATTGACTTGGATACGAACATGTTATATGTAGTTCTATATGAAGGGAAAGAACGGCTT	279.875	46.5	7.78115	6.72628	84	81.5	475	479	62	41	38	45	7.0494	7.24822	8.41047	8.41651	6.88133	6.63463	6.64656	6.74258	hsa-miR-6747-5p	hsa-miR-4735-3p	hsa-miR-4679	hsa-miR-4693-3p	hsa-miR-5700
ASCRP3004428	0.0333634	0.371177	2.02984	up	hsa_circRNA_102659	hsa_circ_0053394	circBase	chr2	-	32142994	32168452	exonic	NM_015955	MEMO1	CAGTATTGAAATGCATTTGCCTTATACAGCTAAAGCCATGGAAAGGACCGCAGCTGAATG	283.25	50.125	7.8195	6.79813	96	86	474	477	57	74	35	34.5	7.17914	7.28097	8.40361	8.41426	6.77968	7.22179	6.60841	6.58265	hsa-miR-328-5p	hsa-miR-485-3p	hsa-miR-519c-3p	hsa-miR-423-5p	hsa-miR-20b-5p
ASCRP3013124	0.0407249	0.371177	1.9943	up	hsa_circRNA_102736	hsa_circ_0001016	circBase	chr2	-	61749745	61753656	exonic	NM_003400	XPO1	TTCTTCCAAGGAACCAGTGCGAAGCAAAGAATGGCTCAAGAAGTACTGACACATTTAAAG	312.75	59.875	7.92943	6.93355	85	107	528	531	68.5	71	49	51	7.07145	7.53265	8.55419	8.55945	6.90608	7.17339	6.81202	6.8427	hsa-miR-23a-3p	hsa-miR-23b-3p	hsa-miR-498	hsa-miR-599	hsa-miR-141-5p
ASCRP3012392	0.00492363	0.371177	1.9938	up	hsa_circRNA_100978	hsa_circ_0003302	circBase	chr11	+	120916382	120930794	exonic	NM_152715	TBCEL	TGGATGTTCCACAGGAAGAAGTGCCATTCAGCATTTTAAGAAAGAAAGATGGATCAACCT	269	57.75	7.88042	6.8849	131	111.5	428.5	405	51	65	58	57	7.46731	7.57351	8.28298	8.19786	6.61873	7.05904	6.95273	6.90909	hsa-miR-651-3p	hsa-miR-298	hsa-miR-154-5p	hsa-miR-335-3p	hsa-miR-424-5p
ASCRP3009553	0.0413079	0.371177	1.98704	up	hsa_circRNA_031235	hsa_circ_0031235	circBase	chr14	-	23371395	23380612	exonic	NM_018107	RBM23	GGCAAAACTGGCAGAAGATCTGACAGGATGGCATCTGATGACTTTGACATAGTGATTGAG	275	48	7.74244	6.75182	79	79	472	470	48	57	43	44	7.01436	7.16832	8.40208	8.38501	6.61045	6.91747	6.70518	6.77417	hsa-miR-3117-3p	hsa-miR-5088-5p	hsa-miR-3919	hsa-miR-138-5p	hsa-miR-7977
ASCRP3003464	0.0361948	0.371177	1.97108	up	hsa_circRNA_003916	hsa_circ_0003916	circBase	chr15	+	68434283	68446033	exonic	NM_016166	PIAS1	CAAAGGGAATAAGGAATCCGGATCATTCTAGAGCTTTAACATCAGACAACAGTCAGCGCT	279.5	52.5	7.78366	6.80467	88	81	475	474	53	51	55	51	7.11976	7.19979	8.41301	8.40208	6.66305	6.80542	6.91187	6.83837	hsa-miR-3138	hsa-miR-6748-5p	hsa-miR-1294	hsa-miR-3689c	hsa-miR-3689b-3p
ASCRP3010342	0.0173587	0.371177	1.9707	up	hsa_circRNA_082680	hsa_circ_0082680	circBase	chr7	-	139316347	139416814	exonic	NM_022740	HIPK2	GTTATATCCAGGAGCTTCGGAGTATGATCAGGTATGGCCTCACATGTGCAAGTTTTCTCC	258.375	53	7.7851	6.80639	183	61.5	393	396	53	65	49	45	7.82185	6.9616	8.18058	8.17635	6.66305	7.05904	6.80461	6.69885	hsa-miR-4518	hsa-miR-6851-5p	hsa-miR-6863	hsa-miR-373-3p	hsa-miR-4695-3p
ASCRP3001216	0.00391826	0.365617	1.96649	up	hsa_circRNA_101103	hsa_circ_0007127	circBase	chr12	+	70671911	70704797	exonic	NM_014515	CNOT2	ACATGTACTACAGCCAGTCTTCTATGTTTCCACATCGGTCAGAAAAAGATAGGGAGACGT	274.125	60.25	7.91274	6.93712	166	101.5	406	423	61	72	50	58	7.72545	7.44696	8.22482	8.25372	6.81105	7.17339	6.81202	6.952	hsa-miR-668-3p	hsa-miR-576-3p	hsa-miR-511-5p	hsa-miR-598-3p	hsa-miR-627-3p
ASCRP3008948	0.0499141	0.371177	1.96408	up	hsa_circRNA_103755	hsa_circ_0071185	circBase	chr4	-	151682934	151729550	exonic	NM_006726	LRBA	GCAGGCCTTGCTTTTATCGAACTTGTCAATGAAGGAAGGCAGTAGATCATCTAATGCAAA	257.5	43.5	7.64126	6.6674	103	49	422.5	455.5	55	42	39	38	7.23258	6.72272	8.2681	8.34161	6.72254	6.65483	6.66305	6.62917	hsa-miR-19b-3p	hsa-miR-19a-3p	hsa-miR-558	hsa-miR-1468-3p	hsa-miR-22-3p
ASCRP3002109	0.0165475	0.371177	1.96011	up	hsa_circRNA_401949		25242744	chr18	-	29218606	29246335	exonic	NM_004775	B4GALT6	AGCGGCTGGAATTTGCGTTTTATGTCATTGAACAGCCAACACATATCTCTTTATGGTACA	195.375	33.75	7.45589	6.48496	109.5	47	307.5	317.5	31	35	33	36	7.30121	6.70605	7.88984	7.92648	6.30343	6.51893	6.526	6.59148	hsa-miR-8053	hsa-miR-7158-5p	hsa-miR-875-5p	hsa-miR-6825-5p	hsa-miR-576-3p
ASCRP3011724	0.0211001	0.371177	1.95623	up	hsa_circRNA_001798	hsa_circ_0001798	circBase	chr8	+	48308935	48320523	exonic	NM_001080394	SPIDR	TCTTTGTGGAGACATCAATGTATTTCTTACCAAAAGACACTTTCAGCCAAGTTCTATAGA	210.375	39	7.51865	6.55057	82	60	347	352.5	59.5	32.5	31	33	7.05464	6.93705	8.03633	8.04658	6.77128	6.42668	6.48246	6.52187	hsa-miR-6830-3p	hsa-miR-4680-3p	hsa-miR-6873-3p	hsa-miR-32-3p	hsa-miR-3198
ASCRP3013605	0.0443062	0.371177	1.92433	up	hsa_circRNA_104417	hsa_circ_0008139	circBase	chr7	+	77210743	77212967	exonic	NM_002835	PTPN12	TTTTTGGAGGATGATATGGGAGTATAATGTTGTGTTGATCACAGCCGAGTTAAATTGACA	207.75	34.25	7.43793	6.49357	80	44	356.5	350.5	32	42	30	33	7.02839	6.61321	8.07088	8.03924	6.3164	6.63463	6.48246	6.5408	hsa-miR-548c-3p	hsa-miR-222-3p	hsa-miR-33a-5p	hsa-miR-519d-5p	hsa-miR-221-3p
ASCRP3000968	0.0391595	0.371177	1.92095	up	hsa_circRNA_005433	hsa_circ_0005433	circBase	chr4	+	119529812	119549381	exonic	NR_109983	LOC729218	AATTTTCATATAAGTGGATTCCAGAGGGGTGACAGCAAAACCTGGACCTACCATGAAAGA	402.5	94.25	8.33397	7.39214	200.5	134	640	635.5	96	143.5	67	70.5	7.91646	7.81279	8.80984	8.79678	7.35437	8.06391	7.0543	7.09599	hsa-miR-3192-5p	hsa-miR-3689c	hsa-miR-3689b-3p	hsa-miR-7851-3p	hsa-miR-6871-5p
ASCRP3009375	0.0281004	0.371177	1.91482	up	hsa_circRNA_103509	hsa_circ_0005362	circBase	chr3	-	169889160	169896726	exonic	NM_024947	PHC3	GGAAGTGTCACACAGCAGTCAAGTATGTCCCAAACGTCTATTTAAGGACCATAGTACAGC	539.125	141.25	8.75582	7.81862	231	256.5	824	845	113	184	129	139	8.06836	8.61313	9.15353	9.18828	7.51099	8.3725	7.66467	7.72631	hsa-miR-647	hsa-miR-558	hsa-miR-93-3p	hsa-miR-20a-3p	hsa-miR-514a-3p
ASCRP3004317	0.00124096	0.333418	1.91373	up	hsa_circRNA_104808	hsa_circ_0087357	circBase	chr9	-	86293355	86301070	exonic	NM_013438	UBQLN1	CAGGAACCAATGCTGAGTGCTGCACAAGAGCAGTTTAAGGAAGAAATCTCTAAACGTTTT	194.375	41.5	7.56694	6.63056	95.5	98	289	295	52	40	39	35	7.183	7.41387	7.82185	7.84905	6.67828	6.61597	6.65572	6.57226	hsa-miR-345-5p	hsa-miR-296-3p	hsa-miR-505-3p	hsa-miR-624-3p	hsa-miR-218-1-3p
ASCRP3003793	0.0242048	0.371177	1.91065	up	hsa_circRNA_083996	hsa_circ_0083996	circBase	chr8	-	38205014	38205733	exonic	NM_017778	WHSC1L1	CACAAAATCCCCAAATTAGAACCAGAGGAACAAAATGCCCGATGAGAGAAAGGGAAAGTT	221.5	40.375	7.55887	6.62481	90	62	374	360	46	41	38.5	36	7.12881	6.92046	8.12039	8.06584	6.59148	6.61597	6.67122	6.62056	hsa-miR-581	hsa-miR-7161-3p	hsa-miR-6134	hsa-miR-7847-3p	hsa-miR-6780b-5p
ASCRP3011209	0.04291	0.371177	1.90087	up	hsa_circRNA_104761	hsa_circ_0001847	circBase	chr9	-	33953282	33963789	exonic	NM_018449	UBAP2	TCAGAGCCTGAACTGGCATCAAATACTCACAACATAGCTCAGGATCTGTCAAACAAAAGT	252.125	49.625	7.69047	6.76381	99.5	69	421	419	53	74	39.5	32	7.21166	7.04243	8.26466	8.24314	6.68655	7.21227	6.65572	6.5007	hsa-miR-34c-5p	hsa-miR-449a	hsa-miR-449b-5p	hsa-miR-449c-5p	hsa-miR-370-3p
ASCRP3003295	0.0318168	0.371177	1.88718	up	hsa_circRNA_001123	hsa_circ_0001014	circBase	chr2	+	61340904	61345251	sense overlapping	NM_032506	KIAA1841	ATTGGGGGATCTGGACCGAGTCAAGTCAAAGGAAGCAAAAGAAGACCTGATATTGAATAG	327.5	72.625	8.02973	7.11349	134	105	527	544	74.5	88	65	63	7.48964	7.48838	8.55155	8.58935	6.99353	7.42359	7.03611	7.00074	hsa-miR-30d-3p	hsa-miR-30e-3p	hsa-miR-548a-3p	hsa-miR-612	hsa-miR-135a-5p
ASCRP3009145	0.0460843	0.371177	1.88596	up	hsa_circRNA_100421	hsa_circ_0006324	circBase	chr1	-	197611840	197627499	exonic	NM_144977	DENND1B	GCGCATCGTGATTATCTCGAGCAAATTAAGCACTTTACCTTCCCTGGTTTGAAGTGTATT	303.875	63.625	7.90487	6.98958	105	83	523.5	504	70.5	71	52	61	7.28602	7.28097	8.54942	8.50309	6.93705	7.17339	6.85788	6.98999	hsa-miR-145-5p	hsa-miR-103a-3p	hsa-miR-107	hsa-miR-496	hsa-miR-372-5p
ASCRP3010968	0.0455998	0.371177	1.86567	up	hsa_circRNA_104556	hsa_circ_0083390	circBase	chr8	+	15480588	15531345	exonic	NM_006765	TUSC3	TATCCGTGGACCTCCATATGCTCATAAGAACCCACACAATGGACAAGTGAATCTTTTAGC	306.625	65.75	7.92508	7.02539	169	64	510	483.5	78.5	75.5	53	56	7.74504	7.01421	8.50873	8.43236	7.10238	7.21227	6.89081	6.89611	hsa-miR-29b-2-5p	hsa-miR-136-5p	hsa-miR-330-3p	hsa-miR-449c-3p	hsa-miR-382-5p
ASCRP3012764	0.0216161	0.371177	1.84775	up	hsa_circRNA_400274		25242744	chr1	+	78268954	78279552	exonic	NM_198549	FAM73A	TTAAACTGGGTGCAGGAGATGCCATTGCTGAAGAAAATGTAGATGTTCAAGTTGTTCCAG	406.625	102.125	8.36492	7.47916	201	146	642.5	637	128	112.5	80	88	7.91646	7.92685	8.81471	8.80168	7.69365	7.71329	7.21105	7.29863	hsa-miR-514a-5p	hsa-miR-518c-5p	hsa-miR-501-5p	hsa-miR-4421	hsa-miR-6730-5p
ASCRP3007665	0.0235791	0.371177	1.84671	up	hsa_circRNA_103508	hsa_circ_0067919	circBase	chr3	-	169889160	169890500	exonic	NM_024947	PHC3	GAAGTGTCACACAGCAGTCAAGTATGTCCCAAACGTCTGTAATTCAACAGGCATTGCATC	481.25	131.5	8.63106	7.7461	221.5	230	746	727.5	115	168	120	123	8.02462	8.47292	9.03395	8.99276	7.5444	8.25615	7.58103	7.60284	hsa-miR-558	hsa-miR-93-3p	hsa-miR-372-3p	hsa-miR-647	hsa-miR-373-3p
ASCRP3002286	0.00826563	0.371177	1.84526	up	hsa_circRNA_104000	hsa_circ_0009145	circBase	chr5	+	167915606	167919852	exonic	NM_002887	RARS	AGGCCAAGTTTGGGGACTATCAGTGTAATAGTGCTATGGGTATTTCTCAGGAAGAAGAGA	169.875	35.875	7.38383	6.5	71	68	267.5	273	38	32.5	37	36	6.93705	7.05904	7.76436	7.77487	6.41488	6.43422	6.56827	6.58265	hsa-miR-582-5p	hsa-miR-519d-5p	hsa-miR-628-5p	hsa-miR-578	hsa-miR-597-5p
ASCRP3010245	0.0358819	0.371177	1.84268	up	hsa_circRNA_103112	hsa_circ_0001178	circBase	chr21	+	17135209	17138460	exonic	NM_013396	USP25	GTGGGAAGCCAAGCAGATACAACACCAGCAGACGTTTTTGAATCAACTGAGAGAAATTAC	342.625	87.625	8.13531	7.2535	151	128	541	550.5	53	87	103.5	107	7.61538	7.72503	8.59659	8.60424	6.69702	7.40964	7.43688	7.47048	hsa-miR-651-3p	hsa-miR-520d-3p	hsa-miR-370-3p	hsa-miR-93-3p	hsa-miR-20b-3p
ASCRP3009147	0.0175512	0.371177	1.84191	up	hsa_circRNA_101099	hsa_circ_0000417	circBase	chr12	+	69644908	69656342	exonic	NM_007007	CPSF6	GCGCGAATATCGTCATCGTTAGAAGGAAGCTGAATATGGTGGGCATGATCAGATAGATTT	182.375	47.25	7.54069	6.65949	113.5	90	264	262	100.5	34	27.5	27	7.34581	7.33806	7.74697	7.73192	7.38872	6.51893	6.391	6.33932	hsa-miR-665	hsa-miR-765	hsa-miR-328-5p	hsa-miR-323a-5p	hsa-miR-608
ASCRP3003716	0.000706176	0.333418	1.83816	up	hsa_circRNA_104347	hsa_circ_0002315	circBase	chr7	-	35709824	35712888	exonic	NM_022373	HERPUD2	CAATAGAGAAAGTCATGAAGCATTGGCATCCAGCAGCAATTCTTTGACGAAGGATCAGAG	208.75	51	7.67584	6.79758	111	116	301	307	54	52	49	49	7.31539	7.62226	7.87295	7.89277	6.71208	6.83149	6.82338	6.82338	hsa-miR-346	hsa-miR-511-5p	hsa-miR-425-3p	hsa-miR-30d-3p	hsa-miR-765
ASCRP3003219	0.033051	0.371177	1.8358	up	hsa_circRNA_103754	hsa_circ_0071174	circBase	chr4	-	151656409	151729550	exonic	NM_006726	LRBA	ATTCACAGACATGCGGAATTTGAGGCAGTAGATCATCTAATGCAAAATTGCCCTCAGTTC	184.875	35.75	7.36987	6.49346	73	46.5	306	314	51	34	31	27	6.95128	6.71294	7.89732	7.91795	6.62917	6.46478	6.48246	6.39743	hsa-miR-205-5p	hsa-miR-19b-3p	hsa-miR-19a-3p	hsa-miR-558	hsa-miR-654-3p
ASCRP3003525	0.0254834	0.371177	1.82817	up	hsa_circRNA_102184	hsa_circ_0045462	circBase	chr17	+	65924470	65928135	exonic	NM_004459	BPTF	CAACACTAGGAAAGGCAATTATTCGAACACCTGTGATGGTACAGCCAGAAACGACTGGAG	180.75	38.25	7.41387	6.54347	67	69	291	296	40	60	27	26	6.89687	7.05904	7.83867	7.86091	6.43213	6.98999	6.391	6.36078	hsa-miR-218-1-3p	hsa-miR-758-3p	hsa-miR-218-5p	hsa-miR-486-5p	hsa-miR-202-3p
ASCRP3009215	0.0150244	0.371177	1.82673	up	hsa_circRNA_104870	hsa_circ_0008043	circBase	chr9	-	114332370	114348445	exonic	NM_012212	PTGR1	GCTCTGAAGGACTTGCTGAAATGGGTCTTAGAGAGTTGTGGAAAGTAAAAATGTAGCCCT	163	35.125	7.36276	6.4935	137	43	235	237	37.5	50	26	27	7.52375	6.65214	7.63758	7.63758	6.40959	6.78804	6.391	6.38539	hsa-miR-208a-5p	hsa-miR-449c-5p	hsa-miR-637	hsa-miR-374a-3p	hsa-miR-205-3p
ASCRP3010481	0.0181968	0.371177	1.81998	up	hsa_circRNA_004286	hsa_circ_0004286	circBase	chr9	-	114886536	114919893	exonic	NM_022486	SUSD1	GTTTGCACAGAGAAAGGCACCTGGAGAGAAAGTACTTTAACATGCACAGGTTTAGACGTC	161.375	31.25	7.28309	6.41917	85	43.5	259	258	42	33.5	25.5	24	7.05971	6.64277	7.71393	7.71596	6.5017	6.50489	6.37976	6.29034	hsa-miR-182-5p	hsa-miR-942-5p	hsa-miR-1299	hsa-miR-7161-3p	hsa-miR-2116-3p
ASCRP3001724	0.0261686	0.371177	1.81963	up	hsa_circRNA_104754	hsa_circ_0003624	circBase	chr9	+	33886878	33900269	exonic	NM_017811	UBE2R2	AGAACTGCCTTCTGAAAGGTGGAATCCTACTCAGAATGTGAGGCGCATATTAAATTTCCT	206.5	43.5	7.51424	6.6506	72	69.5	340.5	344	49	49	40	36	6.95419	7.06593	8.01717	8.01968	6.59148	6.76117	6.62917	6.62056	hsa-miR-136-5p	hsa-miR-134-3p	hsa-let-7e-5p	hsa-miR-342-5p	hsa-miR-449c-5p
ASCRP3012614	0.0197939	0.371177	1.80085	up	hsa_circRNA_101056	hsa_circ_0003664	circBase	chr12	+	50821544	50824353	exonic	NM_052879	LARP4	TGTCTGAAGAAACAATTAGAATTCTGTTTTTCACGCAGGTAGCATCTAAAGGAACTGGTT	170.375	34.5	7.33341	6.48473	87.5	49	268	277	39	39	31	29	7.07613	6.70605	7.7627	7.78875	6.44814	6.59661	6.48246	6.41171	hsa-miR-29b-2-5p	hsa-miR-138-2-3p	hsa-miR-148b-5p	hsa-miR-608	hsa-miR-30d-3p
ASCRP3003291	0.0385863	0.371177	1.79798	up	hsa_circRNA_103599	hsa_circ_0006681	circBase	chr4	+	6995910	7002978	exonic	NM_020773	TBC1D14	ATTGGCAACGAGTTAAATATCACCCACGGAATATGAAGACAAGGCTGGAAGACCTAGCAA	215.875	47.375	7.57927	6.73289	112	61	358.5	332	46	75.5	33	35	7.31539	6.94528	8.07655	7.97987	6.57321	7.24822	6.53789	6.57226	hsa-miR-103a-2-5p	hsa-miR-23a-3p	hsa-miR-30c-1-3p	hsa-miR-23b-3p	hsa-miR-876-3p
ASCRP3012726	0.0192218	0.371177	1.78968	up	hsa_circRNA_100896	hsa_circ_0002290	circBase	chr11	-	77396149	77404656	exonic	NM_016578	RSF1	TGTTGGTATCAGTATTGAAAACATCATTCCTCCACAAATTCTTCTGTGTGACTCTTGCGA	244.5	60	7.73333	6.89363	123.5	77	379.5	398	83	58	49	50	7.42411	7.183	8.1433	8.18291	7.10238	6.91747	6.78051	6.77417	hsa-miR-182-5p	hsa-miR-449c-5p	hsa-miR-144-5p	hsa-miR-196a-3p	hsa-miR-541-3p
ASCRP3012842	0.0489088	0.371177	1.77719	up	hsa_circRNA_103861	hsa_circ_0001494	circBase	chr5	+	65307876	65310553	exonic	NM_018695	ERBB2IP	TTAGAGCTTAGAGAAAACCAGTTAAAAATGTTGCCTAAGAATACAGGAGTTTCCAGAAAA	182.25	35.25	7.33896	6.50936	58	48	308	315	41	42	27	31	6.80461	6.72272	7.90204	7.92648	6.5017	6.65483	6.4017	6.47922	hsa-miR-629-5p	hsa-miR-382-3p	hsa-miR-193a-3p	hsa-miR-193b-3p	hsa-miR-29b-1-5p
ASCRP3013297	0.0478695	0.371177	1.76612	up	hsa_circRNA_101602	hsa_circ_0036399	circBase	chr15	-	76566752	76580286	exonic	NM_000126	ETFA	TTGTTCCCAATGACATGCAAGTTGGACAGACGGGAAAAATAGTAGCACCAAACCTTTTGC	160.625	30	7.22053	6.39994	70	31	266	275.5	32	30	31	27	6.9212	6.43109	7.74697	7.78285	6.33127	6.39529	6.4615	6.41171	hsa-miR-96-5p	hsa-miR-338-3p	hsa-miR-107	hsa-miR-103a-3p	hsa-miR-1271-5p
ASCRP3004630	0.0237277	0.371177	1.76354	up	hsa_circRNA_103223	hsa_circ_0002211	circBase	chr22	-	38890634	38897285	exonic	NM_006386	DDX17	CATCCTCCAGATAGTGGATGTCTGCATGGAAAGTGAAAAAGACCACAAATTTGGAGCAAG	218.625	60.5	7.67859	6.86012	95	111	342.5	326	40	44	83	75	7.17914	7.55807	8.01543	7.96174	6.43213	6.65483	7.2233	7.13023	hsa-miR-605-5p	hsa-miR-1298-3p	hsa-miR-508-5p	hsa-miR-570-5p	hsa-miR-300
ASCRP3001322	0.0282837	0.371177	1.75915	up	hsa_circRNA_003316	hsa_circ_0003316	circBase	chr8	+	38677039	38678153	exonic	NM_006283	TACC1	ACCCAAGAAGGCAAAGTCGCGTTTAATAACAATCACAAGAAGCTGATGAACAGCTTGTAG	159	34.75	7.27914	6.46427	52	65	259	260	42	48	24	25	6.67034	7.00441	7.72588	7.71596	6.4887	6.74763	6.30685	6.3139	hsa-miR-30c-1-3p	hsa-miR-6731-5p	hsa-miR-3160-5p	hsa-miR-6792-3p	hsa-miR-6804-5p
ASCRP3000582	0.0326646	0.371177	1.75857	up	hsa_circRNA_017215	hsa_circ_0017215	circBase	chr1	-	243242289	243265046	exonic	NR_029401	LINC01347	AAGACTTCTGAATCCAGGAAGAGAAACTGACTGGGCAACATGTTATTCAGGCGACGTCAG	406.625	107.75	8.34392	7.52951	186	141.5	653	646	119	115	101	96	7.83582	7.87775	8.83552	8.82657	7.60121	7.74141	7.41176	7.36367	hsa-miR-7851-3p	hsa-miR-665	hsa-miR-1827	hsa-miR-5190	hsa-let-7d-5p
ASCRP3012955	0.00946364	0.371177	1.74552	up	hsa_circRNA_400935		25242744	chr12	+	42748962	42781337	exonic	NM_016488	PPHLN1	TTCATCAAAGGATGAATCTGGTTATAGATGGACAAGAGACGATCATTCTGCAAGCAGGCA	126	29.625	7.18606	6.38241	137	42	156	169	31	41	24	22.5	7.52375	6.63099	7.26192	7.3276	6.33127	6.65483	6.25319	6.29034	hsa-miR-4753-3p	hsa-miR-6772-3p	hsa-miR-518c-5p	hsa-miR-7161-5p	hsa-miR-4742-3p
ASCRP3005631	0.0286572	0.371177	1.74254	up	hsa_circRNA_103129	hsa_circ_0061721	circBase	chr21	-	40590077	40590586	exonic	NM_018963	BRWD1	CGATTTTACAGTTGATCCACCTGAAGAATTAGGAGCTAGTATTTCTGTCACAACAGATGA	187.75	41.625	7.43376	6.63257	64	73	315	299	52.5	51	30	33	6.86408	7.08906	7.9237	7.85819	6.72254	6.80542	6.4615	6.5408	hsa-miR-139-5p	hsa-miR-876-3p	hsa-miR-219a-2-3p	hsa-miR-542-3p	hsa-miR-330-3p
ASCRP3000950	0.0395588	0.371177	1.73657	up	hsa_circRNA_401230		25242744	chr14	-	35036891	35037219	exonic	NM_021249	SNX6	AATTTAGTGGAACTGGCAGAGTTAGAACTGAAGCATGCAAAGGATCTCCTGTATCGAAGG	188.25	41.75	7.39461	6.59837	85	49	309	310	45	39	42	41	7.0494	6.72272	7.90354	7.90279	6.51893	6.53789	6.68004	6.65662	hsa-miR-578	hsa-miR-153-5p	hsa-miR-19b-2-5p	hsa-miR-4727-5p	hsa-miR-19b-1-5p
ASCRP3002324	0.0203253	0.371177	1.73611	up	hsa_circRNA_102010	hsa_circ_0003638	circBase	chr17	+	26490568	26499644	exonic	NM_016231	NLK	AGGGGTCCTCATAAACAGGTTTGAAATATCTCCATTCAGCTGGCATTTTACATCGAGACA	310.125	82.75	8.0431	7.24724	151	119	493	477.5	103	90	60	78	7.6202	7.67694	8.45673	8.41855	7.41361	7.44219	6.9668	7.16637	hsa-miR-670-5p	hsa-miR-891b	hsa-miR-455-5p	hsa-miR-550a-3-5p	hsa-miR-550a-5p
ASCRP3010713	0.0412426	0.371177	1.7309	up	hsa_circRNA_100919	hsa_circ_0002513	circBase	chr11	-	85707868	85712201	exonic	NM_007166	PICALM	TACATCCTATGTCAACTGCTTCTCAGGTAGCAAGTACATGGGGAGGGCAACTACACTTTC	318.625	81.125	8.03186	7.24034	157.5	105	507	505	89.5	104	65	66	7.64491	7.49761	8.49543	8.48949	7.27445	7.64536	7.02839	7.01316	hsa-miR-636	hsa-miR-370-3p	hsa-miR-525-3p	hsa-miR-197-5p	hsa-miR-660-3p
ASCRP3007838	0.0401886	0.371177	1.72709	up	hsa_circRNA_102001	hsa_circ_0005415	circBase	chr17	-	20907514	20908303	exonic	NM_015276	USP22	GACAGCGAAGGCAAAGAGAGCAGGATGAATGGACAGTACCAGCAGCCCACGGACAGTCTC	225.5	52.875	7.60272	6.81438	102	63	366	371	54	65.5	46	46	7.24095	6.9704	8.09436	8.10519	6.71208	7.04174	6.72954	6.77417	hsa-miR-485-5p	hsa-miR-138-5p	hsa-miR-320a	hsa-miR-320b	hsa-miR-876-3p
ASCRP3012853	0.00634496	0.371177	1.71933	up	hsa_circRNA_003428	hsa_circ_0003428	circBase	chr18	+	51804072	51813781	exonic	NM_007195	POLI	TTAGGGACAGAATTACTGGAAGAATTTAGTCCAGTTGTTGAGAGACTTGGATTTGATGAA	130.375	30.75	7.17912	6.39728	49.5	76	193	203	33	35	27	28	6.66305	7.12816	7.44219	7.4831	6.34511	6.44586	6.41277	6.38539	hsa-miR-5697	hsa-miR-196a-5p	hsa-miR-520f-3p	hsa-miR-3920	hsa-miR-4748
ASCRP3001218	0.0270376	0.371177	1.71605	up	hsa_circRNA_102338	hsa_circ_0047347	circBase	chr18	-	29210921	29238052	exonic	NM_004775	B4GALT6	ACATGTATATATTATCCCGAAGGCAATAATTCAAGTGATTATCTTGTTCAAACAACAACG	174.5	40	7.36945	6.59035	104	46	275	273	56	37	33	34	7.24881	6.67034	7.78162	7.77702	6.71208	6.51893	6.54777	6.58265	hsa-miR-511-5p	hsa-miR-576-3p	hsa-miR-149-5p	hsa-miR-362-5p	hsa-miR-146a-5p
ASCRP3003780	0.024559	0.371177	1.7105	up	hsa_circRNA_102183	hsa_circ_0004392	circBase	chr17	+	65924470	65925603	exonic	NM_004459	BPTF	CAATTAGGCCCAATACCTCAGGCTCTGGAGGAACCACAAGCAATTCACAAAAACGACTGG	191.5	48.25	7.49548	6.72105	76	78	311.5	300.5	64.5	59.5	35	34	6.98059	7.21288	7.91646	7.87199	6.85226	6.96232	6.54777	6.52187	hsa-miR-218-1-3p	hsa-miR-758-3p	hsa-miR-218-5p	hsa-miR-486-5p	hsa-miR-202-3p
ASCRP3012996	0.0396475	0.371177	1.70567	up	hsa_circRNA_102374	hsa_circ_0047744	circBase	chr18	+	54398613	54426184	exonic	NM_015285	WDR7	TTCCAGTAATATTGTGCAAGGACAGATTAAACAAGGTGCATTGGATCGTTGTGTGATGGG	210.375	49.25	7.52728	6.75694	92	59	346.5	344	53	57	44.5	42.5	7.14127	6.92046	8.03195	8.01543	6.71208	6.89763	6.73801	6.68004	hsa-miR-503-5p	hsa-miR-424-5p	hsa-miR-15a-5p	hsa-miR-16-5p	hsa-miR-497-5p
ASCRP3011259	0.0446933	0.371177	1.70276	up	hsa_circRNA_104557	hsa_circ_0006410	circBase	chr8	+	15508205	15531345	exonic	NM_006765	TUSC3	TCATAAGAACCCACACAATGGACAAGTGGCAAGCTAATGAAGAATATCAAATACTGGCGA	166.75	36.75	7.30213	6.53425	91	36	269	271	49	40	29	29	7.15032	6.52187	7.76818	7.76813	6.62917	6.63463	6.4615	6.41171	hsa-miR-330-3p	hsa-miR-449c-3p	hsa-miR-382-5p	hsa-miR-618	hsa-miR-558
ASCRP3009212	0.037932	0.371177	1.70272	up	hsa_circRNA_401775		25242744	chr17	-	31065270	31087645	exonic	NM_015194	MYO1D	GCTCTAGTAGACAACCTTGCATCAAAGGCAATATATGAGCGCCTTTTTTGTTGGATCGTT	184.625	42.5	7.396	6.62817	88	49.5	296	305	42	47	42	39	7.10972	6.72954	7.85625	7.88851	6.5017	6.71036	6.68004	6.62056	hsa-miR-6866-3p	hsa-miR-526b-5p	hsa-miR-561-5p	hsa-miR-4762-5p	hsa-miR-95-5p
ASCRP3005668	0.0359674	0.371177	1.69978	up	hsa_circRNA_001735	hsa_circ_0001735	circBase	chr7	+	102038066	102045130	exonic	NM_024653	PRKRIP1	CGGAAGAAGCGGACAAAGCAGTTCCAATTCCAGAGAAAATGAGTGAATGGGCACCTCGAC	166.625	37.875	7.29714	6.5318	58	55.5	277	276	44.5	40	32	35	6.763	6.8507	7.78367	7.7912	6.526	6.57793	6.48246	6.5408	hsa-miR-4775	hsa-miR-1184	hsa-miR-6870-5p	hsa-miR-1273d	hsa-miR-105-3p
ASCRP3007524	0.0423706	0.371177	1.69597	up	hsa_circRNA_103584	hsa_circ_0002688	circBase	chr4	+	1902352	1932497	exonic	NM_007331	WHSC1	GAAGAAGACTCTGTGTTCTAAGAACGGAAGCATCTGGGCTGGATGGAATTTAGCATCAAG	227.75	56.125	7.61682	6.85471	105	63	372.5	370.5	58	53.5	58	55	7.25662	6.97758	8.12209	8.11098	6.74679	6.85109	6.91187	6.90909	hsa-miR-541-5p	hsa-miR-877-3p	hsa-miR-130b-5p	hsa-miR-1271-3p	hsa-miR-96-5p
ASCRP3000629	0.0330467	0.371177	1.69095	up	hsa_circRNA_101490	hsa_circ_0000592	circBase	chr15	+	41988272	41991357	exonic	NM_001080541	MGA	AAGCAGGTGATACATCCTGGTCTTCAAGAAGTCTTATTGCCAGCAGTTTTGAAGATGACT	206.25	50.75	7.52848	6.77065	107	60	334	324	64.5	57	39.5	42	7.27562	6.89687	7.9868	7.95464	6.81859	6.93705	6.65572	6.67122	hsa-miR-501-5p	hsa-miR-130b-5p	hsa-miR-30a-3p	hsa-miR-141-5p	hsa-miR-520g-5p
ASCRP3004262	0.0411174	0.371177	1.68536	up	hsa_circRNA_102250	hsa_circ_0046464	circBase	chr17	+	80721840	80758872	exonic	NM_005993	TBCD	CAGCATGGAGAATGGATGATGAACTTGTTGTTGGACATAGTGCAAGATCAGACATCTCCA	142.75	30.5	7.15392	6.40087	50	41.5	243.5	236	34.5	33	28	26.5	6.70432	6.60563	7.67097	7.63476	6.33932	6.47669	6.42668	6.36078	hsa-miR-2113	hsa-miR-484	hsa-miR-381-3p	hsa-let-7c-3p	hsa-miR-576-3p
ASCRP3013291	0.0357795	0.371177	1.68325	up	hsa_circRNA_102248	hsa_circ_0005281	circBase	chr17	+	80721840	80730383	exonic	NM_005993	TBCD	TTGTGTCCAGAATGGATGATGAACTTGTTGTTGGACATAGTGCAAGATCAGACATCTCCA	137.375	29.75	7.1291	6.37785	47	41	229.5	232	33.5	29.5	27	29	6.64277	6.65214	7.60734	7.61413	6.33932	6.40618	6.35418	6.41171	hsa-miR-576-3p	hsa-miR-646	hsa-miR-219a-2-3p	hsa-miR-181b-2-3p	hsa-miR-181b-3p
ASCRP3009300	0.0105356	0.371177	1.67608	up	hsa_circRNA_102135	hsa_circ_0044875	circBase	chr17	+	57814813	57816308	exonic	NM_030938	VMP1	GCTTTATCTGATTATGGCATCGTCAAAGCATTGTGGTGTCTTTTTTACTGCTGCTTGCTG	220	59.5	7.6619	6.91681	126	81	333	340	60	54.5	59.5	64	7.42883	7.22614	7.9868	8.00583	6.79473	6.88608	6.97328	7.01316	hsa-miR-16-5p	hsa-miR-369-3p	hsa-miR-195-5p	hsa-miR-651-3p	hsa-miR-325
ASCRP3012532	0.0351959	0.371177	1.67483	up	hsa_circRNA_403839		25242744	chr7	+	74148264	74149874	exonic	NM_001518	GTF2I	TGGTGGATCAGCTTTTCTGCAAAAAATTTGACATGAGCTTCTGAATTCAACACGTGAAGA	285.875	74.625	7.90914	7.16513	129	102	443	469.5	95	83.5	61	59	7.45851	7.47606	8.31699	8.38501	7.34913	7.33012	7.00441	6.97686	hsa-miR-32-3p	hsa-miR-1537-5p	hsa-miR-4799-3p	hsa-miR-320e	hsa-miR-6875-3p
ASCRP3004581	0.0490412	0.371177	1.67018	up	hsa_circRNA_102377	hsa_circ_0047818	circBase	chr18	+	56601664	56606853	exonic	NM_018181	ZNF532	CATCAAGATAGGAGAACCAAAAAGACTTGCACTATCTGCCAGATGCTGCTTCCTAACCAG	310.625	90.75	8.09513	7.35513	115.5	190	464	473	96	123	73	71	7.36121	8.22543	8.38501	8.40888	7.33152	7.84308	7.13487	7.11103	hsa-miR-589-5p	hsa-miR-874-5p	hsa-miR-519b-3p	hsa-miR-519a-3p	hsa-miR-2113
ASCRP3000314	0.0058588	0.371177	1.66953	up	hsa_circRNA_101805	hsa_circ_0039261	circBase	chr16	+	47531309	47537001	exonic	NM_000293	PHKB	AAATGCATGAGAGGAATTCTCTACTGCTATATGCGTCAGGCCGATAAGGCTCAGTTTATG	161.25	44.375	7.38955	6.6501	75	83	250	237	64	40	37	36.5	6.98059	7.26745	7.68788	7.62226	6.8427	6.61597	6.58894	6.55278	hsa-miR-15a-5p	hsa-miR-586	hsa-miR-874-5p	hsa-miR-424-5p	hsa-miR-15b-5p
ASCRP3012665	0.0393309	0.371177	1.65538	up	hsa_circRNA_104061	hsa_circ_0001577	circBase	chr6	-	13632601	13644961	exonic	NM_005493	RANBP9	TGTGGCAAGAACACTGCAAACAAAAAAATGTTGAAGCCAAATTTGTATCCTACTGTGGGG	154.125	34.625	7.23018	6.50302	56	49	263.5	248	45	33.5	30	30	6.74763	6.75683	7.7455	7.67075	6.5547	6.46478	6.50489	6.4877	hsa-miR-376c-5p	hsa-miR-376b-5p	hsa-miR-150-3p	hsa-miR-138-5p	hsa-miR-150-5p
ASCRP3002866	0.0371861	0.371177	1.6506	up	hsa_circRNA_000636	hsa_circ_0000636	circBase	chr15	-	75703832	75706652	exonic	NM_015477	SIN3A	ATCTACAAAGCATTCCTGGAGATTTTGCACACATATCAGGTGGAGGATGCGCTATCTTAT	197.75	49.875	7.49686	6.77387	96	61	324	310	61	62	37	39.5	7.18703	6.93705	7.95541	7.90795	6.81105	7.00827	6.62917	6.64701	hsa-miR-5787	hsa-miR-6756-5p	hsa-miR-485-5p	hsa-miR-6884-5p	hsa-miR-4505
ASCRP3000083	0.0345293	0.371177	1.64941	up	hsa_circRNA_102642	hsa_circ_0003828	circBase	chr2	-	24046127	24046439	exonic	NM_017552	ATAD2B	AAAAGTGTTTCCTCATGCTGAAATTAGCCAGAGTGACAAAAAAGAAGGCTACTGTGGAGC	181.25	44.875	7.41698	6.69503	111	49	272	293	64.5	41	36	38	7.32298	6.72954	7.77487	7.84053	6.89763	6.61597	6.62917	6.63735	hsa-miR-635	hsa-miR-499a-3p	hsa-miR-103a-2-5p	hsa-miR-205-3p	hsa-miR-544a
ASCRP3005292	0.0368421	0.371177	1.64832	up	hsa_circRNA_103114	hsa_circ_0003323	circBase	chr21	-	27326903	27328069	exonic	NM_000484	APP	CCGAGGAGATTCAGGATGAAGTTGCCTCGTCACGTGTTCAATATGCTAAAGAAGTATGTC	166.5	38.75	7.31463	6.59363	62	59	275	270	43	33	38	41	6.84034	6.87597	7.77784	7.76436	6.526	6.47669	6.64656	6.72528	hsa-miR-147b	hsa-miR-450b-3p	hsa-miR-873-3p	hsa-miR-509-5p	hsa-miR-592
ASCRP3003228	0.0233983	0.371177	1.64618	up	hsa_circRNA_103722	hsa_circ_0007184	circBase	chr4	+	110451444	110452678	exonic	NM_006323	SEC24B	ATTCATCCCAACTTATACAGGATAGACAGATTGACAGATGAGCTGTGGATCGGTCCGTTT	158.5	40.125	7.30759	6.58847	74	57	252.5	250.5	62	39.5	29	30	6.9704	6.87597	7.70092	7.68306	6.82656	6.5866	6.4615	6.47922	hsa-miR-373-3p	hsa-miR-520e	hsa-miR-302d-3p	hsa-miR-494-3p	hsa-miR-759
ASCRP3002594	0.0294965	0.371177	1.64454	up	hsa_circRNA_103612	hsa_circ_0069338	circBase	chr4	-	25153581	25160729	exonic	NM_016955	SEPSECS	ATAATGCTTATGGAGTGCAGTCTTCAAAGTGTATGCATCTCATTCAGCAGGGCAAGTGTC	222.25	61.375	7.67133	6.95364	103	91.5	349	345.5	63	87	47	48.5	7.24881	7.36367	8.04891	8.02393	6.8427	7.36367	6.79635	6.81185	hsa-miR-649	hsa-miR-9-5p	hsa-miR-616-5p	hsa-miR-532-3p	hsa-miR-140-3p
ASCRP3010113	0.0118981	0.371177	1.64349	up	hsa_circRNA_104001	hsa_circ_0001550	circBase	chr5	+	167915606	167921655	exonic	NM_002887	RARS	GTCTTCTAGTGAATGGAGTTCAACTACCTGCTCTGGGAGAGAATAAAAAGGAAGAAGAGA	152.875	41.875	7.30862	6.59185	70	64	237.5	240	50.5	45	36	36	6.93115	6.99792	7.65319	7.6522	6.58359	6.67475	6.56827	6.5408	hsa-miR-501-5p	hsa-miR-181d-5p	hsa-miR-582-5p	hsa-miR-181b-5p	hsa-miR-30b-3p
ASCRP3002917	0.0126543	0.371177	1.63876	up	hsa_circRNA_100915	hsa_circ_0023904	circBase	chr11	-	85692787	85693046	exonic	NM_007166	PICALM	ATCTTGGCATCGGAAATGGAACCACTAAGAAGCTTTGATGAACTAGGTGGACTTCTCAAA	167.75	44.25	7.37761	6.665	81	70	251	269	55	48	37	37	7.02423	7.04243	7.68788	7.7559	6.71208	6.74763	6.58894	6.61137	hsa-miR-196a-3p	hsa-miR-152-5p	hsa-miR-182-5p	hsa-miR-656-5p	hsa-miR-659-3p
ASCRP3010415	0.0204965	0.371177	1.6358	up	hsa_circRNA_103904	hsa_circ_0073177	circBase	chr5	+	80063751	80088663	exonic	NM_002439	MSH3	GTTGCTGGGAGAACAGGATCAATATGTCCCAAATAATACAGATTTATCATGTTCTACCCA	169.625	45.875	7.39517	6.68517	99.5	61	256	262	50	30	50.5	53	7.19118	6.93705	7.71681	7.73562	6.59148	6.41383	6.85788	6.87751	hsa-miR-17-3p	hsa-miR-16-5p	hsa-miR-541-5p	hsa-miR-15a-5p	hsa-miR-195-5p
ASCRP3008992	0.0231085	0.371177	1.62677	up	hsa_circRNA_103691	hsa_circ_0070382	circBase	chr4	+	88005271	88012981	exonic	NM_005935	AFF1	GCATGTCAGTTCTGTAACCCAAAACCAAACAGACCTACTCCAATGAAGTCCATTGTGTTG	271.625	84	7.91531	7.2133	148	114	399	425.5	63	68	101	104	7.59879	7.59902	8.19862	8.26481	6.8427	7.13999	7.42096	7.44954	hsa-miR-432-3p	hsa-miR-890	hsa-miR-137	hsa-miR-24-3p	hsa-miR-135b-3p
ASCRP3004745	0.0483979	0.371177	1.62013	up	hsa_circRNA_100290	hsa_circ_0013339	circBase	chr1	+	101372407	101379362	exonic	NM_133496	SLC30A7	CATGCTCATGGACATGGACACTTTCATTCTCATGCTTAGGCTTGATTTCCGACTCTTTTC	173.625	43.75	7.35211	6.656	66	59	290	279.5	60	54	31	30	6.87597	6.9115	7.82185	7.79912	6.77968	6.86021	6.50489	6.47922	hsa-miR-29b-3p	hsa-miR-29c-3p	hsa-miR-29a-3p	hsa-miR-767-5p	hsa-miR-218-5p
ASCRP3011641	0.0290261	0.371177	1.61843	up	hsa_circRNA_007290	hsa_circ_0007290	circBase	chrX	-	44383247	44386611	sense overlapping	NM_173794	FUNDC1	TCTGCTGTAAAACAACCTATATGATTGCTAGTCATAGTGGCTATGTGCAGATTGACTGGA	115.125	27	7.01666	6.32207	52.5	34.5	190.5	183	27	32	25	24	6.70993	6.50269	7.43896	7.41504	6.23725	6.39529	6.36539	6.29034	hsa-miR-5787	hsa-miR-3148	hsa-miR-3613-3p	hsa-miR-1273h-5p	hsa-miR-4421
ASCRP3005731	0.0415669	0.371177	1.61088	up	hsa_circRNA_102021	hsa_circ_0000754	circBase	chr17	-	28011580	28030080	exonic	NM_033389	SSH2	CGTCCTAGGAATGGATTTCTCCTCTAATGACAGCATCAGCGAGAGCTTTCTAACTGTCAA	276.875	81.375	7.91498	7.22713	157.5	101.5	419.5	429	75.5	113	66	71	7.66257	7.46844	8.26005	8.26886	7.04243	7.73192	7.02839	7.1058	hsa-miR-620	hsa-miR-200c-5p	hsa-miR-510-3p	hsa-miR-539-5p	hsa-miR-497-3p
ASCRP3012247	0.0287125	0.371177	1.6102	up	hsa_circRNA_100922	hsa_circ_0023923	circBase	chr11	-	85707868	85742653	exonic	NM_007166	PICALM	TGCTTCTCAGGTAGCAAGTACATGGGGAGACTTAATTCAGTGCACAAATGAGATGAATGT	236.875	68.625	7.73538	7.04814	121	96.5	352	378	62.5	87	61	64	7.36914	7.3926	8.0515	8.12829	6.8038	7.39501	6.98059	7.01316	hsa-miR-33b-5p	hsa-miR-891b	hsa-miR-551b-5p	hsa-miR-33a-5p	hsa-miR-1301-3p
ASCRP3008283	0.0493661	0.371177	1.59154	up	hsa_circRNA_102055	hsa_circ_0043302	circBase	chr17	-	36353600	36353765	exonic	NR_036750	LOC440434	GAGCTTGACGCCTTAGATAACAGCCATCCTATTGAAGAATGGTGGACTCATCTTTGGTTA	247.875	68.5	7.7311	7.06067	111.5	81	396	403	85	62	62	65	7.31834	7.21288	8.19148	8.20169	7.18424	7.027	6.99141	7.04003	hsa-miR-34a-3p	hsa-miR-564	hsa-miR-761	hsa-miR-495-3p	hsa-miR-30b-3p
ASCRP3010428	0.0329529	0.371177	1.58936	up	hsa_circRNA_102662	hsa_circ_0053441	circBase	chr2	+	32602655	32620661	exonic	NM_016252	BIRC6	GTTGGGAACCTACTGATGAACCTTGCTAAACCAGGTGGACAGGTGAAATGTCAGTATATC	153	39.75	7.26001	6.59156	74	49	236	253	48	41	35	35	6.9704	6.72954	7.63758	7.70253	6.61873	6.59661	6.56827	6.58265	hsa-miR-379-3p	hsa-miR-411-3p	hsa-miR-380-3p	hsa-let-7e-5p	hsa-miR-183-5p
ASCRP3000322	0.0321688	0.371177	1.58706	up	hsa_circRNA_100594	hsa_circ_0006820	circBase	chr10	+	51381438	51387763	exonic	NR_110767	TIMM23B	AAATGTACAGGATACAGATGAGTTTATTTTACCTACCGGAGCTAATAAAACCCGGGGCAG	157	40.75	7.29697	6.63062	63	63	255	247	52	47	32	32	6.8299	6.9704	7.71681	7.67075	6.68655	6.78804	6.526	6.52187	hsa-miR-15a-3p	hsa-miR-215-3p	hsa-miR-105-5p	hsa-miR-92b-3p	hsa-miR-92a-3p
ASCRP3008807	0.0412831	0.371177	1.58518	up	hsa_circRNA_102052	hsa_circ_0005101	circBase	chr17	+	35800605	35802753	exonic	NM_001488	TADA2A	GATTTCATTGAGGCAGGATGTAGCCAATCAAATGTGCACCAAGACCAAGGAGGAGTGTGA	151.125	37.5	7.22868	6.56403	58	54	249.5	243	43	37	35	35	6.763	6.80864	7.69549	7.64761	6.51893	6.55757	6.56827	6.61137	hsa-miR-203a-3p	hsa-miR-302c-3p	hsa-miR-520d-3p	hsa-miR-302b-3p	hsa-miR-302d-3p
ASCRP3001832	0.0211063	0.371177	1.58248	up	hsa_circRNA_104491	hsa_circ_0003047	circBase	chr7	+	131060182	131130662	exonic	NM_013255	MKLN1	AGACTCTGGGATGGGAACATTTTAGTGGACAAACCAAATGACCAATCTTCAAGATGGTCT	131.25	34.25	7.1541	6.49191	56	53	205	211	39	43	29	26	6.78518	6.80864	7.50617	7.51641	6.46376	6.65483	6.43734	6.41171	hsa-miR-30d-3p	hsa-miR-135a-5p	hsa-miR-215-3p	hsa-miR-607	hsa-miR-653-3p
ASCRP3007104	0.0345923	0.371177	1.57705	up	hsa_circRNA_104765	hsa_circ_0001850	circBase	chr9	-	33960823	33973235	exonic	NM_018449	UBAP2	CTTGGAAGAATTCTGTGGAAGAGTGGACAACAGAAGACTGGACTGAAGATGATTTGGACG	142.375	39.625	7.20167	6.54444	75.5	47	220	227	51	50	29.5	28	6.9668	6.69615	7.56247	7.58127	6.64566	6.76963	6.4017	6.36078	hsa-miR-532-5p	hsa-miR-496	hsa-miR-767-5p	hsa-miR-589-5p	hsa-miR-188-3p
ASCRP3005824	0.00115489	0.333418	1.57705	up	hsa_circRNA_104638	hsa_circ_0084666	circBase	chr8	+	68015271	68018210	exonic	NM_024790	CSPP1	CTAATCAAGATACCTGTAGTCCTTTTGCAGGGATGCTCTTTGGATGCACAGGAACAAACG	291.625	99	8.07084	7.41362	188	152.5	399.5	426.5	87	92	110	107	7.85819	7.97263	8.19494	8.25762	7.22209	7.47302	7.48888	7.47048	hsa-miR-125a-3p	hsa-miR-587	hsa-miR-205-3p	hsa-miR-552-3p	hsa-miR-26b-3p
ASCRP3008769	0.0397695	0.371177	1.57559	up	hsa_circRNA_004815	hsa_circ_0004815	circBase	chr12	+	42745686	42792796	exonic	NM_016488	PPHLN1	GATTGAACAGGATGGCTACAATAGACTAGTTAATATTGTGCCAAAGAAACCACCACTGCT	117.625	32.25	7.09525	6.43936	129.5	29	153	159	36.5	39	26	27.5	7.46971	6.37434	7.26192	7.27504	6.37216	6.57793	6.34154	6.4658	hsa-miR-4733-3p	hsa-miR-1255b-2-3p	hsa-miR-548av-3p	hsa-miR-4753-3p	hsa-miR-5087
ASCRP3001242	0.041366	0.371177	1.56915	up	hsa_circRNA_101574	hsa_circ_0008378	circBase	chr15	+	68434283	68439038	exonic	NM_016166	PIAS1	ACCAAACACGATTGTTGTTTCTTGGACTGCAGAAATTGGAAGACATCAGACAACAGTCAG	186.375	51.25	7.45282	6.80283	72.5	70	304	299	57	58	44	46	6.9668	7.08906	7.88785	7.86757	6.74679	6.94528	6.74511	6.77417	hsa-miR-570-5p	hsa-miR-218-1-3p	hsa-miR-490-3p	hsa-miR-224-5p	hsa-miR-30e-5p
ASCRP3013275	0.0492597	0.371177	1.56848	up	hsa_circRNA_401763		25242744	chr17	+	29061914	29086557	exonic	NR_024187	SUZ12P1	TTGTCAGCTCATTTGCAGCTTACATTTTTGGTTTCTTCCACAAAAATGAGCCAACACAGA	142.375	37	7.16672	6.51736	62	41.5	227	239	42	41.5	29	35.5	6.84034	6.60563	7.59076	7.63017	6.4887	6.60656	6.41277	6.5614	hsa-miR-6855-5p	hsa-miR-3914	hsa-miR-4496	hsa-miR-1252-3p	hsa-miR-8068
ASCRP3013195	0.0441576	0.371177	1.56404	up	hsa_circRNA_104675	hsa_circ_0005231	circBase	chr8	-	117668094	117671219	exonic	NM_003756	EIF3H	TTGCAGATAAACATGAATTGCTCAGCCTTGCCAGCAGTCCAATATCAGATGGAAATGATG	267.375	80.75	7.85945	7.21418	139	96.5	424	410	72	96	73	82	7.54222	7.39769	8.27647	8.22144	6.98857	7.52767	7.12881	7.21166	hsa-miR-22-5p	hsa-miR-29a-5p	hsa-miR-627-3p	hsa-miR-532-5p	hsa-miR-188-3p
ASCRP3006670	0.0101796	0.371177	1.56281	up	hsa_circRNA_001325	hsa_circ_0001325	circBase	chr3	+	107429298	107451870	exonic	NM_020235	BBX	CTGGAGAACATGCTCTTGGCACACCAGAGGTCACAGTAATGAAAGGCAGTAATAGAAATA	135	39	7.22124	6.5771	60	72	206	202	45	47	33	31	6.817	7.08228	7.50259	7.4831	6.57321	6.72954	6.51794	6.4877	hsa-miR-7851-3p	hsa-let-7e-5p	hsa-let-7b-5p	hsa-miR-7160-5p	hsa-miR-4739
ASCRP3004937	0.0378263	0.371177	1.56132	up	hsa_circRNA_104850	hsa_circ_0087855	circBase	chr9	+	110062421	110068928	exonic	NM_002874	RAD23B	CCAACAGCAACTGACAGGTGAAAGCACTGAAAGAGAAGATTGAATCTGAAAAGGGGAAAG	150.375	40.25	7.24611	6.60335	88	43	238.5	232	40	43.5	39.5	38	7.10972	6.63099	7.64356	7.60018	6.47415	6.65483	6.61781	6.6666	hsa-miR-138-5p	hsa-miR-325	hsa-miR-593-3p	hsa-miR-512-3p	hsa-miR-766-5p
ASCRP3011202	0.0187252	0.371177	1.56033	up	hsa_circRNA_407307		25070500	chrX	+	84322132	84329397	exonic	NM_198450	APOOL	TCAGAATCCACTTCAGGTTCCAAGTTTAAGAAAATTACTTATCCTCTGGGACTGGCCACT	128	35.875	7.14489	6.50304	59	56	196	201	39.5	47	29	28	6.80461	6.8427	7.45595	7.47631	6.45638	6.72084	6.47415	6.36078	hsa-miR-129-5p	hsa-miR-5580-5p	hsa-miR-4482-3p	hsa-miR-4724-5p	hsa-miR-4748
ASCRP3002116	0.00555838	0.371177	1.55718	up	hsa_circRNA_405906		25070500	chr2	-	69754347	69759294	exonic	NM_014911	AAK1	AGCTACTCAAGAAAGAGTGCCCAATTCCAAATGTACAGGTTGAAAACATCCTCTTGCATG	183.625	62	7.61197	6.97304	166.5	108	236	224	61	87	51	49	7.71596	7.53956	7.63012	7.56223	6.79473	7.40964	6.85788	6.8299	hsa-miR-6765-3p	hsa-miR-526b-5p	hsa-miR-1294	hsa-miR-449c-5p	hsa-miR-1299
ASCRP3003638	0.00592652	0.371177	1.55595	up	hsa_circRNA_103829	hsa_circ_0072387	circBase	chr5	-	43294157	43297268	exonic	NM_002130	HMGCS1	CAAGATGCTACACCGGGGCTTCGTGGGACACATATGCAACATGCCTATGATTTTTACAAG	126.75	37	7.17585	6.53805	91	53	180	183	54	31.5	32.5	30	7.12881	6.79716	7.38738	7.39007	6.71208	6.44586	6.53789	6.45638	hsa-miR-625-3p	hsa-miR-129-5p	hsa-miR-532-5p	hsa-miR-548c-3p	hsa-let-7c-5p
ASCRP3009567	0.00902338	0.371177	1.55019	up	hsa_circRNA_015677	hsa_circ_0015677	circBase	chr1	+	185153374	185200840	exonic	NM_017673	SWT1	GGCAGCTGTGAGGGATATTCTTGAAGGAATTCAAAGCAAATAATACTTCAGACAGAAAGC	280	96.25	8.00296	7.37051	159	148	396	417	80	87	108	110	7.66489	7.90241	8.20138	8.24314	7.08693	7.40964	7.48888	7.49661	hsa-miR-1183	hsa-miR-103a-2-5p	hsa-miR-548e-5p	hsa-miR-1248	hsa-miR-3667-3p
ASCRP3006845	0.0163117	0.371177	1.53828	up	hsa_circRNA_001379	hsa_circ_0000516	circBase	chr14	+	20811398	20811483	antisense	NR_002312	RPPH1	CTGTTAGGGCCGCCTCTGGCCCTATCTGACCTCGCGCGGAGCCCCGTTCTCTGGGAACTC	257.5	83.125	7.86546	7.24414	133	118	390	389	88	89	78	77.5	7.48021	7.64851	8.1686	8.16452	7.20421	7.43104	7.17496	7.16637	hsa-miR-18b-3p	hsa-miR-670-5p	hsa-miR-23a-5p	hsa-miR-125a-3p	hsa-miR-125b-5p
ASCRP3008545	0.043007	0.371177	1.53825	up	hsa_circRNA_403929		25242744	chr7	-	130295823	130337788	exonic	NM_012133	COPG2	GATCCGAATTGCCAGTCGCTTACTAAAAGAAACTGAGGATGGCAAACATTGAGGAGAATG	126.375	33.5	7.089	6.46771	47.5	48	207.5	202.5	33	36	31	34	6.63372	6.72272	7.5142	7.48536	6.33127	6.49571	6.48246	6.5614	hsa-miR-4494	hsa-miR-4518	hsa-miR-135b-5p	hsa-miR-1184	hsa-miR-135a-5p
ASCRP3010574	0.0248281	0.371177	1.53722	up	hsa_circRNA_103635	hsa_circ_0069715	circBase	chr4	+	52729602	52729875	exonic	NM_015115	DCUN1D4	TAACAGAAGACATTGGCCAAGACGATCACCAAACAGATTTTCAGCTGAACTCTCATCTCT	133.5	37.625	7.19342	6.5731	52	71	199	212	41	49	31.5	29	6.70993	7.07379	7.46731	7.52266	6.46376	6.83149	6.51794	6.47922	hsa-miR-590-5p	hsa-miR-21-5p	hsa-miR-33a-3p	hsa-miR-195-3p
ASCRP3001107	0.0157782	0.371177	1.53571	up	hsa_circRNA_100785	hsa_circ_0008227	circBase	chr11	+	34093272	34093534	exonic	NM_005898	CAPRIN1	ACAGAGGAGTTTCATGGCACTAAGTCAAGATGGTAAGCTTGATGATTACCAGGAACGAAT	126.5	41.25	7.20944	6.59054	72.5	72	180.5	181	39	65	30	31	6.95419	7.10238	7.39114	7.39007	6.42668	7.04174	6.43734	6.45638	hsa-miR-890	hsa-miR-758-3p	hsa-miR-519d-5p	hsa-miR-211-5p	hsa-miR-617
ASCRP3011601	0.0492191	0.371177	1.53433	up	hsa_circRNA_101597	hsa_circ_0036347	circBase	chr15	-	75693070	75705386	exonic	NM_015477	SIN3A	TCTCTGTAAAGAGCATCGACACCCCAGGAGTGATTAGTCGTGTGTCCCAGCTATTCAAAG	294.75	101.125	8.00243	7.38483	192	110	448	429	66	95	125.5	118	7.86843	7.53956	8.33065	8.27109	6.88133	7.48863	7.60734	7.562	hsa-miR-608	hsa-miR-485-5p	hsa-miR-92a-2-5p	hsa-miR-612	hsa-miR-30b-3p
ASCRP3012055	0.0121505	0.371177	1.53175	up	hsa_circRNA_102060	hsa_circ_0007539	circBase	chr17	-	37580879	37584043	exonic	NM_004774	MED1	TGCACCATTAATTATGGGGTCACATCCAGTTGACAATAAATGGTCATTTAATGAACCTGA	120.25	36.125	7.13227	6.51709	66	57	173	185	30	47	34.5	33	6.87597	6.87597	7.36696	7.41017	6.29034	6.72954	6.54777	6.5007	hsa-miR-181b-2-3p	hsa-miR-181b-3p	hsa-miR-493-5p	hsa-miR-30c-2-3p	hsa-miR-1468-3p
ASCRP3002219	0.040941	0.371177	1.53132	up	hsa_circRNA_008498	hsa_circ_0008498	circBase	chr16	-	23113639	23119504	exonic	NM_020718	USP31	AGGAATTCTCAGTCAAAGAGACTATTGTGTCAAAGAATGCACTGCAGTACCGGGGAAATT	110.75	28.875	6.9816	6.36683	52	35	185	171	32	35.5	24	24	6.71466	6.46478	7.40751	7.33946	6.33127	6.50489	6.30685	6.3243	hsa-miR-548az-5p	hsa-miR-548t-5p	hsa-miR-7154-5p	hsa-miR-6859-5p	hsa-miR-6847-5p
ASCRP3002677	0.0434889	0.371177	1.53122	up	hsa_circRNA_101152	hsa_circ_0006396	circBase	chr12	-	112116954	112121111	exonic	NM_006768	BRAP	ATATATGGTGCTGATAAAGTTTCGTGCACAGCCGGGGAAATGTCTGATGAGGAGATAAAA	116.25	33	7.02564	6.41096	61	31.5	188.5	184	42	36	26	28	6.8299	6.43838	7.42411	7.41017	6.45638	6.43422	6.34154	6.41171	hsa-miR-92a-1-5p	hsa-miR-1298-3p	hsa-miR-215-3p	hsa-miR-184	hsa-miR-181b-3p
ASCRP3010868	0.0239674	0.371177	1.53045	up	hsa_circRNA_104235	hsa_circ_0001654	circBase	chr6	+	155095122	155116273	exonic	NM_014892	SCAF8	TAGCTCAGATCTTGCAAAGTCCTCAAGGCCAGCAGTTGTATTCCCTGAATGACTATAAAC	169.625	53.375	7.43236	6.81841	77	91	262	248.5	54.5	72	43	44	6.98059	7.33806	7.73783	7.67296	6.70518	7.13999	6.71208	6.71637	hsa-miR-552-3p	hsa-miR-802	hsa-miR-1298-3p	hsa-miR-215-3p	hsa-miR-889-5p
ASCRP3000971	0.0269185	0.371177	1.52714	up	hsa_circRNA_002850	hsa_circ_0002850	circBase	chr10	-	123661905	123683844	exonic	NM_007041	ATE1	AATTTTTGAGTCTTTACCAGAGAATGCATCACACAAGTTAGAGGCATGTGGGCACATTCC	113.125	33	7.04249	6.43166	73	32	173.5	174	46	31	28	27	6.96087	6.49571	7.35697	7.35642	6.5547	6.39529	6.43734	6.33932	hsa-miR-7161-3p	hsa-miR-875-3p	hsa-miR-3121-5p	hsa-miR-5196-3p	hsa-miR-134-5p
ASCRP3001726	0.0377405	0.371177	1.52631	up	hsa_circRNA_103359	hsa_circ_0008639	circBase	chr3	-	47716964	47719801	exonic	NM_003074	SMARCC1	AGAACTTTGGTCTCCGTACTGACATTTACTCCAAGAAAACATTAGCAAAGATACTTGGCA	164.25	47.375	7.3363	6.72626	79	56	269	253	57	49.5	39.5	43.5	7.00004	6.88836	7.75937	7.69745	6.74679	6.79635	6.66305	6.69885	hsa-miR-629-5p	hsa-miR-432-5p	hsa-miR-449c-3p	hsa-miR-32-3p	hsa-miR-873-5p
ASCRP3011454	0.020883	0.371177	1.52227	up	hsa_circRNA_104776	hsa_circ_0001860	circBase	chr9	+	37126308	37126939	exonic	NM_032226	ZCCHC7	TCCTTCTCAACCTTGTGGGATGTGAAAACTCTGTTACTGAAGCTTCAAGGTTACTGACTT	223.5	72.5	7.6904	7.08417	123	95	335	341	82	52	77	79	7.38684	7.3797	7.99202	8.00302	7.13999	6.8427	7.16512	7.18888	hsa-miR-29a-5p	hsa-miR-144-5p	hsa-miR-627-3p	hsa-miR-301a-5p	hsa-miR-130a-5p
ASCRP3012104	0.0446365	0.371177	1.51676	up	hsa_circRNA_103646	hsa_circ_0001413	circBase	chr4	+	54292038	54310270	exonic	NM_030917	FIP1L1	TGCATTTCCATATGGCAATGGAGATTACCTGGGGCAATTGATGTTATCGGTCAGACTATA	153.625	44.875	7.27087	6.66988	63	58	238.5	255	51.5	46	42	40	6.84034	6.8821	7.6513	7.70975	6.64566	6.67475	6.71208	6.64701	hsa-miR-765	hsa-miR-30b-3p	hsa-miR-520g-5p	hsa-miR-876-3p	hsa-miR-26b-3p
ASCRP3011915	0.00414879	0.371177	1.51641	up	hsa_circRNA_006886	hsa_circ_0006886	circBase	chr16	-	57197912	57207781	exonic	NM_024946	FAM192A	TGAGCCAGATGACAAGAATCAAGATTGGTTGTTTCATTATGGATGGAGGGGATGATGGTA	112.625	35.5	7.10965	6.50899	103	46.5	152	149	41.5	37	30.5	33	7.26381	6.71294	7.23857	7.2233	6.48124	6.55757	6.51794	6.47922	hsa-miR-4677-5p	hsa-miR-4659b-3p	hsa-miR-4659a-3p	hsa-miR-6868-3p	hsa-miR-526b-5p
ASCRP3001450	0.0167449	0.371177	1.51474	up	hsa_circRNA_100894	hsa_circ_0000343	circBase	chr11	-	77336007	77336863	exonic	NM_001293	CLNS1A	ACGATGGAGAAGAATATGATGTGGAAGCACATGAAGAATCAAAAGAACCTGTTGCTGATG	152	47.875	7.3288	6.72973	64	82	238.5	223.5	52.5	44	47	48	6.85304	7.25544	7.64626	7.56046	6.65483	6.6931	6.78051	6.79049	hsa-miR-598-3p	hsa-miR-221-5p	hsa-miR-34c-3p	hsa-miR-29a-5p	hsa-miR-144-5p
ASCRP3003083	0.0288343	0.371177	1.51335	up	hsa_circRNA_101807	hsa_circ_0004791	circBase	chr16	+	47531309	47581459	exonic	NM_000293	PHKB	ATGGCAGCACAGAGCTACATTCGAGGCTCAGTTTATGAACCTCTTAAAAGCATTAATCTT	160.75	49.75	7.35678	6.75903	86	63	245	249	49	62	44	44	7.08147	6.98359	7.67703	7.68504	6.57321	7.00827	6.71208	6.74258	hsa-miR-624-3p	hsa-miR-586	hsa-miR-130b-5p	hsa-miR-126-5p	hsa-miR-374a-3p
ASCRP3001115	0.00963188	0.371177	1.50908	up	hsa_circRNA_001508	hsa_circ_0001508	circBase	chr5	+	80071512	80088663	exonic	NM_002439	MSH3	ACAGATTTATCATTTATGATAGAAATAAAGAACTCTGCTGTATCTTGTATACCAACTGAT	134	41.375	7.21329	6.61962	80	60	200	196	44	34.5	42	45	7.00441	6.92046	7.47606	7.45223	6.51893	6.50489	6.71208	6.74258	hsa-miR-6825-5p	hsa-miR-4739	hsa-miR-6764-5p	hsa-miR-6734-5p	hsa-miR-1266-5p
ASCRP3005329	0.0321195	0.371177	1.50374	up	hsa_circRNA_103600	hsa_circ_0069117	circBase	chr4	+	7006570	7016284	exonic	NM_020773	TBC1D14	CCTAACTCCAGATATCTACCTAATTGATTGAGCTCTTTGACATCTGTCTTGCCCGAGCCA	113.375	31.75	7.01803	6.42947	50.5	43.5	178.5	181	42	33	24	28	6.6774	6.63099	7.38078	7.38295	6.47415	6.45638	6.35418	6.43317	hsa-miR-505-3p	hsa-miR-22-5p	hsa-miR-203a-3p	hsa-miR-1468-3p	hsa-miR-548d-3p
ASCRP3012988	0.0427563	0.371177	1.50123	up	hsa_circRNA_001168	hsa_circ_0001168	circBase	chr20	+	47691321	47707559	exonic	NM_001316	CSE1L	TTCCAGAGACTTCAGAATTCCAAAACAACCAAGTTTATCAAGACTGCTGATGAAGAAGCA	118.875	32.75	7.0527	6.46655	48	47	186.5	194	30	37	33	31	6.63372	6.70605	7.42149	7.44954	6.30343	6.55757	6.526	6.47922	hsa-miR-1184	hsa-miR-3605-5p	hsa-miR-577	hsa-miR-4748	hsa-miR-371b-5p
ASCRP3002480	0.030502	0.371177	1.50094	up	hsa_circRNA_007854	hsa_circ_0007854	circBase	chr3	-	169840378	169843795	sense overlapping	NM_024947	PHC3	AGTGGGGAGAGGAGAAGATTTGACTTCTGAACATCCTTTGTTAGTTTATTTAGGAAAGGG	256.625	103	8.01526	7.4294	172.5	238	302	314	82	78	127	125	7.75335	8.51101	7.8806	7.91608	7.15204	7.29921	7.63758	7.62875	hsa-miR-548bb-5p	hsa-miR-619-5p	hsa-miR-1273g-3p	hsa-miR-30b-3p	hsa-miR-4528
ASCRP3012040	0.032628	0.371177	1.50031	up	hsa_circRNA_100913	hsa_circ_0002884	circBase	chr11	-	85692171	85707972	exonic	NM_007166	PICALM	TGCAACAATGCACATCAAAGCTGCCCAATGATCTGCTTGATTTGCAGCAGCCAACTTTTC	154.875	46.75	7.3145	6.72924	77	63	238	241.5	51	61	40	35	7.01141	6.95273	7.64356	7.65031	6.64566	6.98999	6.68004	6.60126	hsa-miR-656-5p	hsa-miR-361-3p	hsa-miR-421	hsa-miR-563	hsa-miR-380-5p

## Sheet: Downregulated
	P-value and FDR		Fold change and Regulation		Annotations											Group--Raw Intensity		Group--Normalized Intensity		Raw Intensity								Normalized Intensity								miRNA Binding Sites
probeID	P-value	FDR	FC (abs)	Regulation	circRNA	Alias	source	chrom	strand	txStart	txEnd	circRNA_type	best_transcript	GeneSymbol	Sequence	group-Test(raw)	group-Control(raw)	group-Test(normalized)	group-Control(normalized)	[B5, Test](raw)	[B7, Test](raw)	[B11, Test](raw)	[B13, Test](raw)	[B2C, Control](raw)	[B4C, Control](raw)	[B5C, Control](raw)	[B13C, Control](raw)	[B5, Test](normalized)	[B7, Test](normalized)	[B11, Test](normalized)	[B13, Test](normalized)	[B2C, Control](normalized)	[B4C, Control](normalized)	[B5C, Control](normalized)	[B13C, Control](normalized)	MRE1	MRE2	MRE3	MRE4	MRE5
ASCRP3007771	0.0130625	0.371177	7.24624	down	hsa_circRNA_001226	hsa_circ_0001226	circBase	chr22	+	36688187	36689461	antisense	NM_002473	MYH9	GAATTCTTCTCGCCCTCCAGGTCCTTCTGGAGCTTCCTCTTCACCTCCTCAGCAGTTTCC	6776.5	39418.8	12.2871	15.1444	3613	3073.5	10213	10206.5	3840	8383.5	71769	73682.5	11.6031	12.4985	12.5123	12.5346	13.2477	14.4485	16.4406	16.4406	hsa-miR-637	hsa-miR-3192-5p	hsa-miR-661	hsa-miR-5787	hsa-miR-762
ASCRP3010611	0.0460251	0.371177	2.8477	down	hsa_circRNA_000930	hsa_circ_0000930	circBase	chr19	-	37853894	37853978	antisense	NM_181786	HKR1	TAAGGCTTCTCTCCTGAATGTGTCCTCTTGTGTCTGACCAGGTGTGACTTCTGGCTAAAG	949.375	1668.25	9.49088	11.0007	2041.5	720	514	522	1113	695.5	2473.5	2391	10.7692	10.1384	8.51818	8.53779	11.2183	10.4266	11.1929	11.1649	hsa-miR-642a-3p	hsa-miR-642b-3p	hsa-miR-506-5p	hsa-miR-4270	hsa-miR-6798-5p
ASCRP3009246	0.0414994	0.371177	2.569	down	hsa_circRNA_006606	hsa_circ_0006606	circBase	chr12	-	58142964	58143287	exonic	NM_000075	CDK4	GCTGCTGCTGGCCTCTCTTCTGTGGAAACTCTGAAGCCGACCAGTTGGGCAAAATCTTTG	1861.25	3096.62	10.6815	12.0427	2535	1515	1702	1693	4150	1324	3472	3440.5	11.0678	11.2515	10.2029	10.2039	13.3818	11.5357	11.6266	11.6266	hsa-miR-486-3p	hsa-miR-518c-5p	hsa-miR-6775-5p	hsa-miR-6787-5p	hsa-miR-744-5p
ASCRP3005959	0.0306634	0.371177	2.52791	down	hsa_circRNA_104510	hsa_circ_0004069	circBase	chr7	-	140055467	140058585	exonic	NM_032295	SLC37A3	CTAGCTTCTTCTGTTCTTCAGTATGGTTATGAGGTGTTTGTCTTTGGTGCGCTCACAGAA	298.625	551.75	8.22195	9.5599	382	392	195.5	225	625	454	567	561	8.60731	9.23707	7.46215	7.58127	10.1156	9.67757	9.22568	9.22078	hsa-miR-744-3p	hsa-miR-409-3p	hsa-miR-194-5p	hsa-miR-214-3p	hsa-miR-508-5p
ASCRP3005958	0.0275029	0.371177	2.49384	down	hsa_circRNA_104511	hsa_circ_0082708	circBase	chr7	-	140055467	140069482	exonic	NM_032295	SLC37A3	CTAGCTTCTTCTGTTCTTCAGTATGGTTATGAGATCTGGAGCAGCAACCATTTGTTCCCC	278.25	517.875	8.1288	9.44717	389.5	348	199.5	176	572.5	414.5	538.5	546	8.62185	9.04782	7.47859	7.36696	9.93947	9.50507	9.16301	9.18113	hsa-miR-744-3p	hsa-miR-298	hsa-miR-409-3p	hsa-miR-224-3p	hsa-miR-194-5p
ASCRP3002905	0.00731546	0.371177	2.30731	down	hsa_circRNA_406888		25070500	chr6	-	158549139	158569986	exonic	NM_032861	SERAC1	ATCTTCATTCTTCTATAGTTCGCTCAGGTATTGCCTGGCAGGCAAGAAAAGAACTTCACA	161	310.5	7.56518	8.77139	229.5	171	129.5	114	276.5	280.5	346	339	8.05387	8.09789	7.11103	6.99792	8.82969	8.93281	8.66932	8.65374	hsa-miR-301a-5p	hsa-miR-646	hsa-miR-367-5p	hsa-miR-22-5p	hsa-miR-4303
ASCRP3012369	0.0136334	0.371177	2.26916	down	hsa_circRNA_100759	hsa_circ_0004099	circBase	chr11	-	9225206	9229179	exonic	NM_015213	DENND5A	TGGAGTTTCAAATCCTGCTCTACTCACAGCCATTATGCCAGTACATACAGGCTTCTAAAG	93.25	202.75	7.09675	8.27891	77	118	89	89	280	223	122.5	185.5	7.01141	7.66373	6.85398	6.85788	8.84602	8.63329	7.60317	8.03315	hsa-miR-508-5p	hsa-miR-561-5p	hsa-miR-616-5p	hsa-miR-761	hsa-miR-328-5p
ASCRP3005036	0.0355926	0.371177	2.24399	down	hsa_circRNA_001257	hsa_circ_0001257	circBase	chr22	-	50713540	50713723	sense overlapping	NM_012401	PLXNB2	CCAGACATCCTGGGATCCTATGTCTGTCTGTCCACCACGAGATGGGAGGAGGAGAAAAAG	369	761	8.42816	9.59423	553	311	319	293	360	284	1184	1216	9.03946	8.88989	7.93846	7.84485	9.21152	8.95764	10.0858	10.122	hsa-miR-6724-5p	hsa-miR-371a-3p	hsa-miR-6825-5p	hsa-miR-6089	hsa-miR-1909-5p
ASCRP3010889	0.000251434	0.333418	2.18953	down	hsa_circRNA_079972	hsa_circ_0079972	circBase	chr7	-	43906156	43908975	exonic	NM_032014	MRPS24	TAGTCTCTCATCTGCTATTGAATAAAGACCTTCTATCTTGGTGCTGTCCTGGAGCCGAGA	205.75	341.5	7.7392	8.86983	244	115	233	231	321	244.5	423	377.5	8.12426	7.62226	7.61011	7.60018	9.06762	8.75185	8.87777	8.78206	hsa-miR-3689d	hsa-miR-3909	hsa-miR-6851-5p	hsa-miR-409-5p	hsa-miR-6792-3p
ASCRP3003125	0.000313343	0.333418	2.18547	down	hsa_circRNA_074944	hsa_circ_0074944	circBase	chr5	+	169108747	169111354	exonic	NM_004946	DOCK2	ATGTCTCTCTACGACCCCAACAAGCAAACGGTCATAAGAATCCTTGAGCTTGATTTGATT	423	634.75	8.5646	9.69254	488	240	480	484	598.5	427	801.5	712	8.88651	8.51101	8.4194	8.44146	9.99853	9.56442	9.67564	9.53156	hsa-miR-374a-3p	hsa-miR-4784	hsa-miR-4502	hsa-miR-1248	hsa-miR-4659b-3p
ASCRP3010256	0.0313449	0.371177	2.07127	down	hsa_circRNA_403044		25242744	chr3	+	185318552	185327138	exonic	NM_021627	SENP2	GTGGTCATGGAAACTCTGTCTGTCCTGTAACTTCAAATTATCACAGGTAATAAATCTCCT	2322.88	3396	10.9809	12.0314	3401	1925.5	1942	2023	2063	1407	5102.5	5011.5	11.5177	11.6405	10.364	10.4012	12.2243	11.5976	12.1599	12.1437	hsa-miR-3121-5p	hsa-miR-3692-3p	hsa-miR-6504-3p	hsa-miR-1324	hsa-miR-4436a
ASCRP3011700	0.016275	0.371177	2.03478	down	hsa_circRNA_100934	hsa_circ_0023988	circBase	chr11	-	89155069	89185063	exonic	NM_016931	NOX4	TCTTCTTTGTCTTCTACATGCTGCTGACGTTGCATGTTTCAGGCTAGGATTGTGTCTAAG	142.5	249.25	7.45779	8.48267	209.5	159.5	101.5	99.5	212.5	217.5	284	283	7.95541	8.02427	6.93999	6.9115	8.40264	8.58783	8.47152	8.46867	hsa-miR-655-5p	hsa-miR-448	hsa-miR-485-5p	hsa-miR-613	hsa-miR-103a-3p
ASCRP3010397	0.00605694	0.371177	2.01738	down	hsa_circRNA_062139	hsa_circ_0062139	circBase	chr22	+	17100506	17119630	exonic	uc002zlt.3	TPTEP1	GTTCTTCTTCGAGTATTTGTAGAAGGGGTAAAGACCTAGAGGTGAGGTCTCTGAGCAAGG	89.5	174.875	7.06507	8.07755	121	109	67	61	174	159	191.5	175	7.37807	7.57114	6.67916	6.6319	8.10052	8.18894	8.05523	7.96553	hsa-miR-6847-5p	hsa-let-7c-3p	hsa-miR-6817-5p	hsa-miR-125b-2-3p	hsa-miR-3145-5p
ASCRP3009730	0.00665032	0.371177	2.01545	down	hsa_circRNA_000393	hsa_circ_0000393	circBase	chr12	+	46321391	46321685	antisense	NM_004719	SCAF11	GGGGCTCTCTATAAGCTCCTCTGTTTTTAGCAACTCTGTAGATCTAGGATGTTCGGTCAG	111.75	199	7.22572	8.23682	110	104	117	116	282	153	209	152	7.31539	7.50964	7.04243	7.03542	8.85838	8.13776	8.13856	7.81259	hsa-miR-186-5p	hsa-miR-450a-1-3p	hsa-miR-576-3p	hsa-miR-4432	hsa-miR-3976
ASCRP3008818	0.0168672	0.371177	2.01428	down	hsa_circRNA_016459	hsa_circ_0016459	circBase	chr1	+	215259710	215298093	exonic	NM_014217	KCNK2	GATTTGGGAAGTTCCTTCTTCTTTGCTGGCACTGTTATTACAACCATAGTGGCGGCACCT	169.75	279.25	7.6285	8.63876	218	197.5	129.5	134	248	258	315	296	8.0025	8.27611	7.1058	7.12959	8.65374	8.82786	8.56577	8.50768	hsa-miR-193b-5p	hsa-miR-134-5p	hsa-miR-4439	hsa-miR-6820-5p	hsa-miR-5190
ASCRP3005245	0.025006	0.371177	1.98807	down	hsa_circRNA_403634		25242744	chr6	+	71242862	71248104	exonic	NM_020819	FAM135A	CCCTCGCCAAACTTTTTTATATAAGCTTAGTAACAAAGCAGGAAACAGTGCAGATCTCCG	350	567.875	8.41995	9.41132	365	375	320	340	399	280.5	746	846	8.56362	9.16301	7.94418	8.00899	9.38019	8.93281	9.59351	9.73875	hsa-miR-548g-5p	hsa-miR-548x-5p	hsa-miR-548aj-5p	hsa-miR-590-5p	hsa-miR-29a-5p
ASCRP3006403	0.0382783	0.371177	1.98577	down	hsa_circRNA_400014	hsa_circ_0092353	circBase	chr10	+	81059688	81060008	intronic	ENST00000334512	ZMIZ1	CTCTTCCTGGCTTGCTTGTCACACATATATGGTCATGTGCTTGTGACTCAGACCCCCTTG	278.125	432.5	8.13536	9.12506	366	295	221.5	230	448	225	532	525	8.56362	8.8135	7.57019	7.59413	9.5669	8.64747	9.15684	9.12905	hsa-miR-660-3p	hsa-miR-214-3p	hsa-miR-140-5p	hsa-miR-596	hsa-miR-216a-3p
ASCRP3004871	0.0120879	0.371177	1.9277	down	hsa_circRNA_041100	hsa_circ_0041100	circBase	chr16	+	89961445	89977071	exonic	NM_014972	TCF25	CATTGCTCTCTTCTTCCGGTCACTGTTGCCAAACTATACCATGGAGGTTCTGCTCCAGAC	501.375	615.75	8.80848	9.75536	599	320	546.5	540	683	539	644	597	9.12681	8.9249	8.60317	8.57902	10.2768	10.0124	9.40905	9.32326	hsa-miR-5580-5p	hsa-miR-4518	hsa-miR-6721-5p	hsa-miR-1909-3p	hsa-miR-4722-5p
ASCRP3007061	0.0164895	0.371177	1.9237	down	hsa_circRNA_406986		25070500	chr7	+	99202008	99208228	sense overlapping	NM_001195541	GS1-259H13.2	CTTCTTTACCCTTCTTCAAGCCATGTGAGTGATGCTGACGTTAGAGGACAAGGACATGAA	211.375	316	7.85371	8.79759	234	229.5	196.5	185.5	250	336	329.5	348.5	8.08949	8.44863	7.45851	7.41821	8.66555	9.20924	8.6207	8.69487	hsa-miR-7851-3p	hsa-miR-6848-5p	hsa-miR-5787	hsa-miR-665	hsa-miR-661
ASCRP3006793	0.0453524	0.371177	1.91544	down	hsa_circRNA_104448	hsa_circ_0007520	circBase	chr7	+	102398300	102401858	exonic	NR_026879	FAM185A	CTGTCTTCTGCTGCTGGGGATATTACATTAGGAAGTGTTCATGGGTCAAAAATTGCATGT	406.25	559.75	8.57555	9.51322	405	346.5	445	428.5	738	271	614	616	8.67385	9.0283	8.32375	8.27629	10.4423	8.8934	9.35329	9.36391	hsa-miR-194-5p	hsa-miR-298	hsa-miR-545-3p	hsa-miR-802	hsa-miR-380-3p
ASCRP3008702	0.020482	0.371177	1.91233	down	hsa_circRNA_011883	hsa_circ_0011883	circBase	chr1	-	40544231	40546159	exonic	NM_000310	PPT1	GATGGTGAAATTCCTCAATGATTCCATTGTGGACCCTGTAGATTCGGAGCCTCGTGCAAG	59.875	126.625	6.78318	7.71851	52.5	101	43	43	123.5	167	101	115	6.68374	7.47606	6.49571	6.47719	7.66667	8.25025	7.41176	7.54536	hsa-miR-3117-3p	hsa-miR-3653-5p	hsa-miR-6508-3p	hsa-miR-664a-3p	hsa-miR-4529-5p
ASCRP3004656	0.046086	0.371177	1.90741	down	hsa_circRNA_101849	hsa_circ_0040016	circBase	chr16	+	69173727	69177292	exonic	NM_032830	CIRH1A	CATCTCATCGCTAATGCTGACGTGCAGTCCATTGCTGTAGCTGACGTCGCATCCTGAGTC	134.875	233.125	7.40317	8.33478	127	220.5	94	98	183	145	293.5	311	7.42883	8.39025	6.8821	6.9115	8.20184	8.0697	8.50542	8.56217	hsa-miR-367-3p	hsa-miR-489-3p	hsa-miR-214-5p	hsa-miR-92a-3p	hsa-miR-106a-3p
ASCRP3011050	0.0270841	0.371177	1.89149	down	hsa_circRNA_004121	hsa_circ_0004121	circBase	chr2	-	102027080	102038934	exonic	NM_001145664	RFX8	TATTCCTCAGCTGTCTGTCTTCACATCTCCAAGCATTTGTGTTCCAGTGTGAAGATCATT	763.75	1181.62	9.37751	10.297	1040	602	700	713	597.5	519	1796	1814	9.77003	9.84107	8.94649	8.95247	10.0039	9.91162	10.6199	10.6527	hsa-miR-1270	hsa-miR-4742-5p	hsa-miR-4446-3p	hsa-miR-6830-5p	hsa-miR-4677-5p
ASCRP3001937	0.00294927	0.34873	1.878	down	hsa_circRNA_405133		25070500	chr13	+	36939636	36943737	sense overlapping	NR_045180	SPG20-AS1	AGATCTCTCTGCCCAGGCTTGGAAATACATAAGGATCAGATTACTAGGAAAGCCAAGTCT	422.875	537.5	8.5828	9.49199	481	259.5	483	468	563	429	605.5	552.5	8.86719	8.6446	8.43438	8.38501	9.89155	9.56016	9.32139	9.19488	hsa-miR-6824-5p	hsa-miR-3162-5p	hsa-miR-3976	hsa-miR-3202	hsa-miR-6881-5p
ASCRP3009293	0.0263986	0.371177	1.87776	down	hsa_circRNA_101876	hsa_circ_0007548	circBase	chr16	-	74666420	74670475	exonic	NM_018124	RFWD3	GCTTGCTACTCTCTGCTTCCCTAGACAACACTATTAAACTGACCAGGACTTGCAAAAACT	687.625	812.875	9.24749	10.1565	765.5	476	748	761	949	614	865	823.5	9.39623	9.51668	9.0367	9.04034	10.9235	10.2573	9.74037	9.70484	hsa-miR-449c-5p	hsa-miR-27a-3p	hsa-miR-27b-3p	hsa-miR-887-5p	hsa-miR-636
ASCRP3003047	0.00993242	0.371177	1.87647	down	hsa_circRNA_401844		25242744	chr17	-	57963443	57968289	exonic	uc010ddg.2	TUBD1	ATGCTTCTGTCAAAAACAAGGTTCTGGAAACAACTGGGCATATGGTGACTCACACAGTTC	50.75	106.375	6.61428	7.52229	37	45	62	59	133.5	143	62	87	6.49571	6.68655	6.64566	6.62917	7.76767	8.06147	6.99141	7.26862	hsa-miR-3187-5p	hsa-miR-4666b	hsa-miR-450b-5p	hsa-miR-181b-3p	hsa-miR-6758-3p
ASCRP3008767	0.00479082	0.371177	1.86128	down	hsa_circRNA_104379	hsa_circ_0080251	circBase	chr7	+	56049902	56062681	exonic	NM_001483	GBAS	GATTCTTCTCTCAGATTGGGCAGCTGTACATGGTGCACCATCTTTGGGTCCACCTCTGGA	148.75	214.375	7.45744	8.35374	153	113	171	158	274	201	197.5	185	7.63113	7.59902	7.33332	7.26628	8.80984	8.492	8.08883	8.02427	hsa-miR-185-3p	hsa-miR-96-5p	hsa-miR-22-3p	hsa-let-7a-2-3p	hsa-miR-767-5p
ASCRP3011563	0.0117595	0.371177	1.84877	down	hsa_circRNA_028883	hsa_circ_0028883	circBase	chr12	+	120933858	120936298	exonic	NM_003746	DYNLL1	TCTCAAAATCCATTCCTTTAAAAAATAAATCTGATGCAGATGTGTAGGCGGGAGCAGGGC	59.875	120.5	6.75649	7.64306	70	72	44	53.5	93	160.5	103	125.5	6.89687	7.08906	6.48246	6.55757	7.28746	8.21486	7.44115	7.62875	hsa-miR-6868-3p	hsa-miR-891a-3p	hsa-miR-513c-3p	hsa-miR-513a-3p	hsa-miR-1910-5p
ASCRP3000478	0.0165035	0.371177	1.8433	down	hsa_circRNA_100780	hsa_circ_0021569	circBase	chr11	+	32948702	32949669	exonic	NM_001076786	QSER1	AACTACTCTCTTACCACAATTCAGGGCTCCATCCTGGCAGACAGTTTAAGCTATGAAGAA	177.625	246.625	7.64382	8.52611	199	130	195.5	186	324.5	249	223	190	7.90927	7.78367	7.46731	7.41504	9.07663	8.76522	8.21705	8.04555	hsa-miR-665	hsa-miR-345-3p	hsa-miR-7-5p	hsa-miR-219a-2-3p	hsa-miR-26a-5p
ASCRP3011094	0.0235835	0.371177	1.81939	down	hsa_circRNA_028882	hsa_circ_0028882	circBase	chr12	+	120907659	120936298	exonic	NM_001037494	DYNLL1	TCAAAATCCATTCCTTTAAAAAATAAATCTGATGCAGATGTGTAGGGAGAGCCTGGGGCC	153.125	228.5	7.54319	8.40665	184	168	127	133.5	196	252	204	262	7.8421	8.08669	7.10238	7.14159	8.30422	8.79678	8.12039	8.4052	hsa-miR-766-3p	hsa-miR-6078	hsa-miR-6868-3p	hsa-miR-4665-3p	hsa-miR-513c-3p
ASCRP3003111	0.0407082	0.371177	1.80308	down	hsa_circRNA_101215	hsa_circ_0029531	circBase	chr12	-	133245396	133248908	exonic	NM_006231	POLE	ATGTACCCCAACATCATCCTGACCAACCGCCTGCAGAATCCTGCCGCCTTTGACTTCCTG	528.5	624.25	8.76552	9.61598	294.5	246	769	804.5	664.5	278	774	780.5	8.3325	8.54119	9.06527	9.12312	10.2225	8.93866	9.65644	9.64629	hsa-miR-877-3p	hsa-miR-362-3p	hsa-miR-22-5p	hsa-miR-650	hsa-miR-216a-5p
ASCRP3002095	0.0394664	0.371177	1.76722	down	hsa_circRNA_406338		25070500	chr3	+	122928045	122978436	exonic	NM_012430	SEC22A	AGCCTGCCTTTACCAGGTCTTCTCTGTTGGTTGAAATGTCTATGATTTTATCTGCCTCAG	474.625	580.5	8.77741	9.59889	497.5	437	482	482	675	382	650	615	8.91223	9.34681	8.42936	8.42124	10.261	9.35329	9.42146	9.35986	hsa-miR-30a-3p	hsa-miR-4526	hsa-miR-301b-5p	hsa-miR-145-5p	hsa-miR-4311
ASCRP3000078	0.0498489	0.371177	1.75581	down	hsa_circRNA_006116	hsa_circ_0006116	circBase	chr7	-	98718265	98718826	exonic	ENST00000472627	SMURF1	AAAAGCTGCTGCTGAGTGGGGCTTCCAGAATTCAAGGTCTAAATTGACATATTTGGGAAG	100.125	164.5	7.15031	7.96244	153	113	66.5	68	221	97	172.5	167.5	7.62363	7.61011	6.68374	6.68374	8.46943	7.52767	7.92786	7.92481	hsa-miR-4291	hsa-miR-4652-3p	hsa-miR-6793-3p	hsa-miR-6874-3p	hsa-miR-5096
ASCRP3010079	0.0139984	0.371177	1.75208	down	hsa_circRNA_407224		25070500	chr9	-	113137647	113139646	exonic	NM_153366	SVEP1	GTCTCGCTGTCATACAGCTGTCTGTCGATTTCCATGTCAGAATGGGGGCATCTGCCAACG	118.5	192.25	7.28527	8.09433	145	113	111	105	145	116.5	253	254.5	7.57256	7.59902	7.00862	6.96087	7.88747	7.75636	8.35961	8.37389	hsa-miR-6720-5p	hsa-miR-6512-3p	hsa-miR-3189-5p	hsa-miR-6762-5p	hsa-miR-3937
ASCRP3010033	0.00731933	0.371177	1.74475	down	hsa_circRNA_104166	hsa_circ_0077527	circBase	chr6	-	105563560	105573453	exonic	NM_007073	BVES	GTCCTCTCTTCGTAAAGATTGAAAAGGAACTCAGTGGCATGTACCGGCGATTGTTTGAAC	311.25	359.75	8.1822	8.98522	291.5	160	394.5	399	427	306	379.5	326.5	8.33435	8.02003	8.18894	8.18546	9.4853	9.07224	8.76263	8.6207	hsa-miR-491-3p	hsa-miR-338-3p	hsa-miR-17-3p	hsa-miR-124-3p	hsa-miR-539-3p
ASCRP3000543	0.0168062	0.371177	1.74134	down	hsa_circRNA_042079	hsa_circ_0042079	circBase	chr17	-	9843442	9850300	exonic	NM_003644	GAS7	AAGAACTTAGCTAAGCTCTCTCAGAACTCCTTGGCTTCACAGGAGGAAGGATAAACTGTG	116.75	150.5	7.12128	7.92148	122.5	43	158	143.5	207	130	145	120	7.40619	6.61321	7.27778	7.18796	8.37931	7.95088	7.76859	7.58714	hsa-miR-6868-3p	hsa-miR-199a-3p	hsa-miR-199b-3p	hsa-miR-148a-5p	hsa-miR-1180-3p
ASCRP3012205	0.0128474	0.371177	1.73904	down	hsa_circRNA_102237	hsa_circ_0046419	circBase	chr17	+	80417867	80430574	exonic	NM_012336	NARF	TGCTGACCTCTGCCTGTCCTGGAATGTAGTAAGAAAACAAAAACTGATGACCAAGAGAAT	1801	1977.25	10.6386	11.4369	2155.5	1337.5	1863	1848	1609	1320	2496	2484	10.8712	11.0455	10.3211	10.3167	11.7677	11.5177	11.2269	11.2354	hsa-miR-212-5p	hsa-miR-424-5p	hsa-miR-1468-3p	hsa-miR-2113	hsa-miR-762
ASCRP3004087	0.0169407	0.371177	1.72991	down	hsa_circRNA_406841		25070500	chr6	+	126434011	126496057	antisense	NR_049880	MIR5695	CAGAAGAGTGAGTCGCAAAAAGAGAAAATGACAGAAATGGAGCACCCTGGGAAAAGAAAC	149.5	173.875	7.29999	8.09069	84	63	228	223	218	179.5	136	162	7.05971	6.98359	7.59076	7.56591	8.45121	8.3325	7.69788	7.88117	hsa-miR-4644	hsa-miR-6758-5p	hsa-miR-6878-5p	hsa-miR-5584-5p	hsa-miR-6760-5p
ASCRP3010965	0.0461594	0.371177	1.71164	down	hsa_circRNA_103890	hsa_circ_0007158	circBase	chr5	-	74109664	74137504	exonic	NM_015566	FAM169A	TATCCACTGTCTTCTCTCATGTATACAGAGGATGGCATTCCCTGTGGATATGCTGGAAAA	450.125	659	8.69204	9.46742	502	342	464.5	492	308	295	1021	1012	8.91821	9.01568	8.37914	8.45513	8.99656	9.02255	9.93193	9.91865	hsa-miR-583	hsa-miR-185-5p	hsa-miR-519c-3p	hsa-miR-106b-5p	hsa-miR-20b-5p
ASCRP3005154	0.00194868	0.333418	1.68899	down	hsa_circRNA_091840	hsa_circ_0091840	circBase	chrX	-	153576899	153583440	exonic	NM_001456	FLNA	CCCACTAGTTCTCTTCTCCAGCCAAGAGGAATAAAGTTTTGCTTCCATTGTGCTGGCATC	211.875	260.125	7.81433	8.57049	215	160	228	244.5	238	256	284	262.5	7.99246	8.02003	7.59076	7.65409	8.58689	8.82015	8.47431	8.40061	hsa-miR-185-3p	hsa-miR-6789-5p	hsa-miR-4741	hsa-miR-6829-5p	hsa-miR-6813-5p
ASCRP3010426	0.0116415	0.371177	1.68886	down	hsa_circRNA_081001	hsa_circ_0081001	circBase	chr7	-	91755566	91756945	exonic	NM_000786	CYP51A1	GTTGGCTGCCTTTGCCTAGTTTCAGGTTTTCTTGGAGCAGAAGAAAATGTTAAAAAGTGG	119.625	180.5	7.30281	8.05887	148	114	108	108.5	142	133	220	227	7.61206	7.63804	6.98359	6.97758	7.83227	7.95088	8.21038	8.24195	hsa-miR-5189-3p	hsa-miR-5689	hsa-miR-29a-5p	hsa-miR-4490	hsa-miR-490-3p
ASCRP3006792	2.90135e-05	0.333418	1.68044	down	hsa_circRNA_102211	hsa_circ_0045905	circBase	chr17	+	76410959	76415806	exonic	NR_110602	PGS1	CTGTCTCTAGCATCACCTCTCAGCACGATTTTCCCGAGAGTTCACAGGCCTCTGGCTGTA	278.375	327.25	8.06565	8.81449	256.5	166	332.5	358.5	299	242.5	405.5	362	8.16922	8.04751	7.98786	8.05802	8.96041	8.7353	8.83552	8.72673	hsa-miR-520g-5p	hsa-miR-412-3p	hsa-miR-608	hsa-miR-597-3p	hsa-miR-127-5p
ASCRP3008443	0.0134176	0.371177	1.67925	down	hsa_circRNA_103327	hsa_circ_0064832	circBase	chr3	-	37162982	37163182	exonic	NM_006309	LRRFIP2	GAGTTGAGGATGCATTGTCCATTCGAAGTGTTGGCAGTCACAGGGAAGATTCGGAAAGGG	51.125	94	6.63759	7.38541	38	57.5	53	56	118	120	58	80	6.50984	6.8821	6.55949	6.59894	7.59483	7.81897	6.9273	7.20054	hsa-miR-488-5p	hsa-miR-134-5p	hsa-miR-148b-3p	hsa-miR-586	hsa-miR-612
ASCRP3009247	0.00942306	0.371177	1.66052	down	hsa_circRNA_104878	hsa_circ_0003458	circBase	chr9	-	115013208	115060196	exonic	NM_005156	PTBP3	GCTGCTTTTGCGGGGATCTGATGAGCTTCTTTCTTCTGGCATCATTAACGGACCTTTTAC	283.625	340.375	8.14561	8.87725	319	238.5	290	287	316.5	272.5	394.5	378	8.4137	8.51483	7.83227	7.82165	9.04034	8.8934	8.80537	8.76988	hsa-miR-1301-3p	hsa-miR-493-3p	hsa-miR-593-3p	hsa-miR-516a-3p	hsa-miR-516b-3p
ASCRP3006171	0.0475485	0.371177	1.6546	down	hsa_circRNA_407286		25070500	chrX	-	50438785	50442435	sense overlapping	NM_020717	SHROOM4	CTCATTCTCATCAAAGGCTCCTTCCGGATTCTCAAGCTGATTGTCAGGAGGTCACTGAAT	158.75	207	7.57316	8.29964	160	201	137	137	236	185	196	211	7.68438	8.28969	7.15032	7.16825	8.58689	8.3761	8.07655	8.15902	hsa-miR-5194	hsa-miR-4533	hsa-miR-503-3p	hsa-miR-1236-3p	hsa-miR-6780b-5p
ASCRP3002336	0.0140744	0.371177	1.65178	down	hsa_circRNA_104040	hsa_circ_0075410	circBase	chr6	+	304627	311962	exonic	NM_020185	DUSP22	AGGTGACACATATTCTGTCTGTCCACGATAGTGCCAGGCCTATGTTGGAGATCCTGCCCG	182.5	234.5	7.69374	8.41776	214.5	175.5	164	176	220	188	263.5	266.5	7.98786	8.12273	7.30463	7.35972	8.46376	8.39407	8.39895	8.41426	hsa-miR-221-5p	hsa-miR-153-5p	hsa-miR-592	hsa-miR-597-5p	hsa-miR-190b
ASCRP3006722	0.0238744	0.371177	1.65038	down	hsa_circRNA_404620		25070500	chr1	-	180256410	180257652	sense overlapping	NM_032360	ACBD6	CTGGGACTACAGCCTCTGCCTGTGAGTTTCTGGATATTGTAGAGCTGCTGCTCCAGTCTG	204.375	256.125	7.79535	8.51815	245	170	202	200.5	182.5	281.5	284	276.5	8.13239	8.09213	7.48385	7.47302	8.1997	8.9475	8.46867	8.45673	hsa-miR-3613-3p	hsa-miR-6766-5p	hsa-miR-4459	hsa-miR-665	hsa-miR-3065-3p
ASCRP3009638	0.0286088	0.371177	1.64545	down	hsa_circRNA_407239		25070500	chr9	-	127446879	127447265	intronic	ENST00000344523	NR6A1	GGCTGCTCTCTGGGGAGGAATTTATTTTAATTGCCAGTAAGAAGAAGTTTCCTATTGGCC	125.875	174.625	7.34092	8.0594	166	122.5	106	109	217	124	191	166.5	7.71938	7.69126	6.96304	6.98999	8.44624	7.83867	8.04891	7.90377	hsa-miR-432-5p	hsa-miR-7153-3p	hsa-miR-6838-5p	hsa-miR-6823-3p	hsa-miR-4725-5p
ASCRP3005058	0.0311496	0.371177	1.643	down	hsa_circRNA_007848	hsa_circ_0007848	circBase	chr1	+	231930987	231954263	exonic	NM_018662	DISC1	CCAGGAGACTGCCTATGCCTCCAGGAAAGAATAAAATCCCTCAACTTGTCACTTAAAGAA	212.75	264.75	7.85416	8.57049	249	222	191	189	250	217	296.5	295.5	8.14429	8.4194	7.42935	7.42359	8.66555	8.58783	8.51818	8.51039	hsa-miR-942-5p	hsa-miR-3907	hsa-miR-6512-3p	hsa-miR-6886-3p	hsa-miR-1266-5p
ASCRP3006408	0.0357195	0.371177	1.64132	down	hsa_circRNA_406455		25070500	chr4	-	22399613	22404422	intronic	ENST00000504617	GPR125	CTCTTCTTCATGTCGCTGACTCCCACTTACCTTGCAGGATTTGACGGGATCTGAACTATA	223.875	268.625	7.90309	8.61795	261	218.5	211	205	263	280	272.5	259	8.18863	8.4052	7.52864	7.48989	8.7353	8.92425	8.43014	8.38211	hsa-miR-590-3p	hsa-miR-466	hsa-miR-3916	hsa-miR-2054	hsa-miR-641
ASCRP3005954	0.000239714	0.333418	1.63641	down	hsa_circRNA_103064	hsa_circ_0060456	circBase	chr20	+	42315491	42328684	exonic	NM_002466	MYBL2	CTAGCCTCTCTGAAGCCCTGGACTTGATCGAGTCGGTCATCGAGCTGGTTAAGAAGTATG	91.375	127.875	7.02081	7.73134	89.5	66	104	106	127.5	131	137	116	7.13615	7.02839	6.95782	6.96087	7.69766	7.95088	7.71874	7.55807	hsa-miR-647	hsa-miR-412-3p	hsa-miR-637	hsa-miR-660-3p	hsa-miR-16-5p
ASCRP3006406	0.0217907	0.371177	1.6208	down	hsa_circRNA_044353	hsa_circ_0044353	circBase	chr17	+	46189392	46196548	exonic	NM_013323	SNX11	CTCTTCTCACCTGGCTAAAGGAGACCAGCCTAAGAGATGTTTCCTTCCAATGGGCTTTTG	236.125	270.25	7.94529	8.642	237	203.5	251	253	285	288	271	237	8.08602	8.30026	7.69745	7.69745	8.86688	8.99188	8.42177	8.28746	hsa-miR-4691-3p	hsa-miR-4269	hsa-miR-6715b-5p	hsa-miR-4270	hsa-miR-1205
ASCRP3002621	0.00544838	0.371177	1.61875	down	hsa_circRNA_100430	hsa_circ_0007167	circBase	chr1	+	203676136	203677232	exonic	NM_001684	ATP2B4	ATACCTCCAAGATTCTGGTCTGCTCATGTCTGCTCTCACGGTTTTCATCCTGATTCTATA	885.875	1037	9.57478	10.2697	1110	582	912	939.5	708.5	547.5	1454	1438	9.8628	9.79087	9.30426	9.34119	10.36	10.0497	10.3443	10.3245	hsa-miR-624-3p	hsa-miR-100-3p	hsa-miR-598-5p	hsa-miR-601	hsa-miR-520g-5p
ASCRP3005914	0.0327701	0.371177	1.6149	down	hsa_circRNA_001655	hsa_circ_0001655	circBase	chr6	-	156468903	156489628	intergenic			CTACTCTCCCTGGGGCTGGATAAAGAAACTGAGGCTCAATGAACTTGTAACGCTTTAGTG	414	454.625	8.59103	9.28248	344.5	314.5	516	481	554	392	476.5	396	8.50669	8.91308	8.52312	8.42124	9.85361	9.41374	9.02541	8.83715	hsa-miR-6813-5p	hsa-miR-5001-5p	hsa-miR-762	hsa-miR-4498	hsa-miR-185-3p
ASCRP3007948	0.0340553	0.371177	1.61181	down	hsa_circRNA_007662	hsa_circ_0007662	circBase	chr4	+	140258001	140262223	exonic	NM_057175	NAA15	GACCTTTCCTTACTACAGATTCAAATGCGAGATCTTGAGGGTTACAGGAAACCTTGGCTA	139.75	182	7.44584	8.13452	146.5	169	117.5	126	178	181	192	177	7.58127	8.05995	7.05076	7.09137	8.16079	8.35653	8.05523	7.96553	hsa-miR-3185	hsa-miR-20b-3p	hsa-miR-1-5p	hsa-miR-651-3p	hsa-miR-4778-3p
ASCRP3011138	0.00173103	0.333418	1.60501	down	hsa_circRNA_406366		25070500	chr3	+	137928658	137964025	exonic	NM_015396	ARMC8	TCAAGCTCTATGCCTCTCTTGGAGCAAATGATGAAGACATCCGGAAGAAGGAAGTAACAG	65.5	99.25	6.7371	7.41968	62	43	77	80	135	86.5	96.5	79	6.8299	6.60563	6.74156	6.77128	7.74949	7.38899	7.35134	7.18888	hsa-miR-4645-3p	hsa-miR-8089	hsa-miR-335-3p	hsa-miR-1294	hsa-miR-183-5p
ASCRP3005948	0.0190582	0.371177	1.60363	down	hsa_circRNA_400070	hsa_circ_0092299	circBase	chr22	+	35817493	35819173	intronic	ENST00000216122	MCM5	CTAGAGGCTGTCTCTGTCCAAGAACTCCCATTGTCCCAGTCCCTGGCTCGGAGCTCTGTG	1460.62	1657.62	10.3267	11.008	1931	957	1448	1506.5	1095.5	858	2318.5	2358.5	10.6926	10.6331	9.9687	10.0124	11.1319	10.7455	11.0455	11.1092	hsa-miR-665	hsa-miR-214-3p	hsa-miR-550a-5p	hsa-miR-550a-3-5p	hsa-miR-33b-3p
ASCRP3013206	0.00942475	0.371177	1.59983	down	hsa_circRNA_104164	hsa_circ_0005932	circBase	chr6	-	105280916	105300246	exonic	NM_020771	HACE1	TTGCCTGCCAGAACGGTCACAAGACGATAATGAAACTGCTGTTTATACATTAATGCCAAT	217.75	243.625	7.81384	8.49175	186	145	272	268	310.5	169	254	241	7.8421	7.88832	7.77157	7.75335	9.02007	8.26466	8.37806	8.30422	hsa-miR-346	hsa-miR-489-3p	hsa-miR-106a-3p	hsa-let-7a-2-3p	hsa-miR-651-5p
ASCRP3005373	0.0115833	0.371177	1.59422	down	hsa_circRNA_101029	hsa_circ_0025705	circBase	chr12	-	27132716	27143560	exonic	NM_016551	TM7SF3	CCTCATCTCGTCAGTGACTTTCTTTACTCCACTGGGTGGTTACCCTAACAGCTAATGATA	93.375	137.5	7.08603	7.75888	85	106	91	91.5	133	93	175	149	7.09961	7.53265	6.85398	6.85788	7.7724	7.48863	7.96192	7.81259	hsa-miR-765	hsa-miR-143-3p	hsa-miR-206	hsa-miR-1-3p	hsa-miR-149-3p
ASCRP3006372	0.00133719	0.333418	1.58948	down	hsa_circRNA_104583	hsa_circ_0006539	circBase	chr8	+	30332294	30361953	exonic	NM_006867	RBPMS	CTCTGCCCAACACTGTACCTCAGTTCATTGCCAGAGAGCCATGTCCGGACCCTATTTGTC	146.125	181.75	7.44547	8.11402	140	116.5	173	155	152	179	203	193	7.54788	7.63386	7.35134	7.24881	7.94705	8.32767	8.11049	8.07088	hsa-miR-548a-3p	hsa-miR-142-3p	hsa-miR-205-3p	hsa-miR-129-5p	hsa-miR-618
ASCRP3006840	0.0418467	0.371177	1.58374	down	hsa_circRNA_400107		25242744	chr1	-	3659367	3659754	exonic	NR_033708	TP73-AS1	CTGTGTTTTCTCTGGGACATGTCTTCTGCCCAGGCACTTTGATCCGGTTTTCCAGTTCTT	90.125	137.375	7.06578	7.72912	131.5	98	67	64	124	86	176.5	163	7.48021	7.42778	6.68655	6.66856	7.65063	7.40964	7.96192	7.89429	hsa-miR-9500	hsa-miR-4739	hsa-miR-4756-5p	hsa-miR-939-5p	hsa-miR-671-5p
ASCRP3008532	0.0462296	0.371177	1.58041	down	hsa_circRNA_400463		25242744	chr1	+	236920785	236923089	exonic	NM_001103	ACTN2	GATCATGAGGATTTCAGAGCCTGCCTGATTTCCATGGGTTATGACCTGCACATTCGTGTT	220.125	249.125	7.8836	8.5439	247	213	208	212.5	294	216	238.5	248	8.14131	8.3705	7.50617	7.51641	8.93346	8.59659	8.30201	8.34356	hsa-miR-146a-3p	hsa-miR-6886-3p	hsa-miR-2467-5p	hsa-miR-1273g-5p	hsa-miR-760
ASCRP3004056	0.0366615	0.371177	1.57676	down	hsa_circRNA_029349	hsa_circ_0029349	circBase	chr12	-	125396191	125396596	exonic	uc001ugr.3	UBC	CACTTTCCTTTCAATAAAGTTGTTGCATTCCCAAGTTGATCTTTGCTGGGAAACAGCTGG	164.75	200.75	7.59546	8.25242	193	175	143.5	147.5	192	198	198	215	7.86843	8.11098	7.19518	7.20726	8.27792	8.45371	8.09213	8.18593	hsa-miR-5009-5p	hsa-miR-4782-5p	hsa-miR-130b-5p	hsa-miR-8056	hsa-miR-1324
ASCRP3008194	0.0462224	0.371177	1.57541	down	hsa_circRNA_405248		25070500	chr14	+	67243181	67291284	exonic	NM_020806	GPHN	GAGATGTCACTCCAGAGGTTGGGTGGGACTATATCAGCATACAAGATAGTACCAGATGAA	73.75	118.75	6.9213	7.57703	124	72	48	51	132	70	137	136	7.43506	7.12816	6.55066	6.57131	7.74949	7.13999	7.70889	7.70975	hsa-miR-3925-3p	hsa-miR-19b-3p	hsa-miR-4482-3p	hsa-miR-19a-3p	hsa-miR-5692c
ASCRP3005844	0.0198514	0.371177	1.57388	down	hsa_circRNA_039190	hsa_circ_0039190	circBase	chr16	+	32761191	32761364	exonic	uc010vfx.1	AK300387	CTACACCCTGTAGATGCCTCTGCCGTGTAGCTGTCCGACGTCTCATAAGCTTTTGTCTGG	268.25	302.875	8.07807	8.7324	281	216.5	289.5	286	224.5	328	328	331	8.27734	8.38609	7.83068	7.81817	8.50135	9.15938	8.63017	8.63868	hsa-miR-99b-3p	hsa-miR-4799-5p	hsa-miR-8068	hsa-miR-6772-5p	hsa-miR-6515-5p
ASCRP3007953	0.00310391	0.352251	1.57214	down	hsa_circRNA_006240	hsa_circ_0006240	circBase	chr19	+	4430545	4432204	exonic	NM_005483	CHAF1A	GACGAGCAGAGATGATGATGACGACATGGGAGAGGATGAAGATGAGGACGATGGTTTCTT	33.25	68.5	6.42583	7.07856	31	39	32	31	81	86	46	61	6.37868	6.58359	6.37216	6.36889	7.15204	7.38899	6.79635	6.97686	hsa-miR-483-3p	hsa-miR-4695-5p	hsa-miR-939-3p	hsa-miR-6774-5p	hsa-miR-518f-3p
ASCRP3004969	0.0306319	0.371177	1.56582	down	hsa_circRNA_102065	hsa_circ_0043497	circBase	chr17	-	38209550	38209888	exonic	NM_014815	MED24	CCAATCCTCTCATCTTGTCCTACCTGAAGTATGCCATTAGTTCCCAGCTGGCCGCCACCG	172.5	191.75	7.56109	8.20801	143	111	216	220	253	201	174	139	7.55519	7.58907	7.54981	7.55029	8.6984	8.48233	7.93846	7.71286	hsa-miR-335-3p	hsa-miR-186-5p	hsa-miR-380-5p	hsa-miR-296-3p	hsa-miR-522-3p
ASCRP3004794	0.0257348	0.371177	1.56051	down	hsa_circRNA_102804	hsa_circ_0056139	circBase	chr2	+	113258782	113278002	exonic	NM_153712	TTL	CATGTGCTCAGTGAAGGCATTCTCATCTCCTCAGAGGCTTCAGAGCTTCTCGATTTCATA	148.625	180.875	7.47839	8.1204	130	134	165.5	165	249.5	133	182	159	7.46731	7.82185	7.32004	7.30435	8.65944	7.95686	7.99794	7.86738	hsa-let-7f-5p	hsa-let-7i-5p	hsa-let-7a-5p	hsa-let-7g-5p	hsa-miR-148a-5p
ASCRP3005644	0.00181755	0.333418	1.56002	down	hsa_circRNA_033191	hsa_circ_0033191	circBase	chr14	-	100826890	100828258	exonic	NM_004184	WARS	CGCAGAGGCATCTTCTTCTCACACAGGATGAAATTGATTCTGCAGTAAAGATGTTGGTGT	75.625	111.375	6.89207	7.53363	88	62	79	73.5	95	106.5	112	132	7.10972	6.9704	6.76117	6.72699	7.31834	7.63804	7.50518	7.67296	hsa-miR-532-5p	hsa-miR-590-5p	hsa-miR-4668-3p	hsa-miR-556-5p	hsa-miR-6508-3p
ASCRP3013302	0.0122548	0.371177	1.55021	down	hsa_circRNA_405995		25070500	chr2	-	173360102	173360954	sense overlapping	ENST00000442417	AC093818.1	TTGTTCTGTCTTGTCACACCAACTGTTACTGATGAACAGGGAAGAGATTACTGCGTTCAG	49.25	88.625	6.61881	7.25128	51	46	50	50	113	47	95	99.5	6.68374	6.70605	6.5408	6.54467	7.53241	6.74763	7.32579	7.39929	hsa-miR-6844	hsa-miR-9-5p	hsa-miR-4503	hsa-miR-211-5p	hsa-miR-223-3p
ASCRP3007294	0.0206701	0.371177	1.54945	down	hsa_circRNA_103847	hsa_circ_0007915	circBase	chr5	+	61745753	61747760	exonic	NM_016338	IPO11	GAAAACTATTTTATGATTGCTCTCTCAGAGGAGGAGAAAACTACTCTGCGTGCAGGGCTC	89.625	111.125	6.93193	7.56368	87	35.5	122	114	149.5	107	106	82	7.09961	6.53109	7.06862	7.02839	7.92056	7.67296	7.44954	7.21166	hsa-miR-659-3p	hsa-miR-424-5p	hsa-miR-106a-3p	hsa-miR-378a-3p	hsa-miR-378d
ASCRP3002342	0.0270783	0.371177	1.54733	down	hsa_circRNA_103330	hsa_circ_0004194	circBase	chr3	+	41265511	41268843	exonic	NM_001904	CTNNB1	AGGTGCTATCTGTCTGCTCTAGTAATAAGCCGGCTATTGTAGAAGCTGGGTATTTGAAGT	147.75	197.625	7.4405	8.07028	132	108	176	175	139.5	106	274	271	7.48021	7.55807	7.36005	7.36367	7.79891	7.62089	8.43014	8.43119	hsa-miR-544a	hsa-miR-338-3p	hsa-miR-218-2-3p	hsa-miR-491-3p	hsa-miR-449c-5p
ASCRP3004659	0.00493715	0.371177	1.54237	down	hsa_circRNA_101501	hsa_circ_0034953	circBase	chr15	+	43668295	43669265	exonic	NM_014444	TUBGCP4	CATCTCTCCATATCACATGTCAACTACTTCCTAGACCAGGTATCGCAGGACTTCCCTTTC	103.625	129.375	7.11234	7.73748	85.5	78	125.5	125.5	164	126	130	97.5	7.08906	7.16832	7.09236	7.09961	8.02829	7.88308	7.66942	7.36914	hsa-miR-146b-3p	hsa-miR-506-5p	hsa-miR-298	hsa-miR-873-5p	hsa-miR-185-5p
ASCRP3006180	0.0426645	0.371177	1.53839	down	hsa_circRNA_103287	hsa_circ_0007975	circBase	chr3	+	11399891	11406208	exonic	NM_006395	ATG7	CTCCAACCTCTCTTGGGCTTGTGCCTCACCAGAATGCCAGAGGATTCAACATGAGCATAC	221.375	225.5	7.79726	8.41868	215	114	295	261.5	292	232	208	170	7.98786	7.6283	7.8507	7.72216	8.91375	8.68582	8.14811	7.92704	hsa-miR-182-5p	hsa-miR-593-3p	hsa-miR-671-5p	hsa-miR-100-3p	hsa-miR-608
ASCRP3007724	0.0465302	0.371177	1.53795	down	hsa_circRNA_400418		25242744	chr1	-	225600155	225607500	exonic	NM_002296	LBR	GAATGACCTGTCGCCTGCCAGCTCTGAAGCCATTTGGAAATAGCATCAGCAGATATAATG	313.125	337.75	8.26507	8.88608	315	274	324	339.5	406	248	339	358	8.40264	8.70062	7.95759	7.99942	9.40484	8.77534	8.64952	8.71463	hsa-miR-4778-3p	hsa-miR-466	hsa-miR-3173-3p	hsa-miR-6077	hsa-miR-6831-5p
ASCRP3007114	0.0455423	0.371177	1.53428	down	hsa_circRNA_405025		25070500	chr12	+	69853296	69856305	sense overlapping	ENST00000549261	RP11-956E11.1	CTTGGCATCTCTCCATAGTCACCATTTAGAAGGCTCCTGGGTTCTGTTCTATGTCATTTC	171	196.125	7.62027	8.23783	186	155	173	170	259.5	174	184	167	7.83906	7.96607	7.34236	7.3336	8.72378	8.30336	8.00513	7.91907	hsa-miR-3976	hsa-miR-1252-5p	hsa-miR-541-5p	hsa-miR-4644	hsa-miR-6878-5p
ASCRP3008257	0.0452967	0.371177	1.52713	down	hsa_circRNA_402119		25242744	chr19	-	47584769	47585552	exonic	NM_015168	ZC3H4	GAGCTCTTGGATAAGGGAGACCACTGTAATTTTAGCCATGACATCGAACTCCCAAAGAAG	152.125	186.125	7.53427	8.14509	176.5	168	130	134	183	139.5	217	205	7.79323	8.07822	7.11976	7.14587	8.20809	8.03195	8.1974	8.14294	hsa-miR-4277	hsa-miR-4660	hsa-miR-4632-5p	hsa-miR-6801-5p	hsa-miR-7843-5p
ASCRP3006597	0.00168555	0.333418	1.52606	down	hsa_circRNA_030787	hsa_circ_0030787	circBase	chr13	-	101936283	101944717	exonic	NM_052867	NALCN	CTGCCTCCAGGAACTAGTATATTCACCGTCTATGAGGCCGCCTCACAGGAAGGCTGGGTG	92.375	123.625	7.03902	7.64884	92	84	101	92.5	104	110.5	140	140	7.12881	7.22614	6.93705	6.86408	7.42149	7.70361	7.74394	7.72631	hsa-miR-424-5p	hsa-miR-3915	hsa-miR-16-5p	hsa-miR-1267	hsa-miR-181c-5p
ASCRP3005130	0.00721286	0.371177	1.52387	down	hsa_circRNA_406605		25070500	chr5	+	55556529	55557468	intergenic			CCATTCCAGGACTTGTGGACAGTACCTGCAGTACGTGGATCATTCATGTGAATGGCTTTC	36	67.875	6.45318	7.06092	29.5	44.5	28	42	64.5	90	48	69	6.35418	6.6224	6.34043	6.49571	6.89763	7.44219	6.82974	7.07413	hsa-miR-4766-5p	hsa-miR-6873-5p	hsa-miR-1249-5p	hsa-miR-6797-5p	hsa-miR-4530
ASCRP3002229	0.04301	0.371177	1.52354	down	hsa_circRNA_002649	hsa_circ_0002649	circBase	chr5	-	39382719	39388954	exonic	NM_001343	DAB2	AGGACTGCTAAGAATGGGAGTGAGGCCCTAATGATTCTAGATGACCAAACTAACAAACTG	60.5	92	6.75808	7.36551	53	80	51	58	114	121.5	64	68.5	6.68374	7.183	6.55422	6.61137	7.53241	7.81897	7.02839	7.08228	hsa-miR-6851-5p	hsa-miR-3689d	hsa-miR-6809-3p	hsa-miR-4753-3p	hsa-miR-8068
ASCRP3007762	0.03794	0.371177	1.52236	down	hsa_circRNA_043247	hsa_circ_0043247	circBase	chr17	-	35578644	35601650	exonic	NM_198834	ACACA	GAATTCCAGTTCATGCTGCCCACATCTCATCCAAACAGGCTGAACTTCACACAGGTAGTC	143.5	172.125	7.46767	8.07399	126	169	143	136	190.5	149	176	173	7.44696	8.08669	7.19118	7.14587	8.2651	8.11016	7.96607	7.9546	hsa-miR-3921	hsa-miR-3192-5p	hsa-miR-4653-5p	hsa-miR-8077	hsa-miR-1299
ASCRP3000175	0.00115357	0.333418	1.5208	down	hsa_circRNA_045801	hsa_circ_0045801	circBase	chr17	-	74385612	74397235	exonic	NM_022066	UBE2O	AAACTTTTTTTTACTTGCAGGTCTCTTCTTCGATGATTCCTATGGCTTCTACCCAGGCCA	58.75	90.125	6.73205	7.33688	65.5	52	59.5	58	86.5	98	86	90	6.88057	6.80864	6.62761	6.61137	7.21288	7.57161	7.26439	7.29863	hsa-miR-6885-5p	hsa-miR-612	hsa-miR-3192-5p	hsa-miR-328-5p	hsa-miR-1248
ASCRP3007696	0.00194228	0.333418	1.51908	down	hsa_circRNA_100519	hsa_circ_0017412	circBase	chr10	-	909682	910210	exonic	NM_015155	LARP4B	GAATATGACTCTCTGCCTGAAAATAGCGAGACAGGTACCAGCAACTAAGGTTTCAGAGCT	202.125	224.875	7.73265	8.33585	217	119.5	240	232	178.5	174	287	260	8.00941	7.65275	7.65834	7.61011	8.16703	8.29894	8.48664	8.39079	hsa-miR-383-3p	hsa-miR-423-5p	hsa-miR-424-5p	hsa-miR-15b-5p	hsa-miR-411-3p
ASCRP3010097	0.0114402	0.371177	1.51816	down	hsa_circRNA_103986	hsa_circ_0074623	circBase	chr5	+	150838348	150859050	exonic	NM_078483	SLC36A1	GTCTGCCTGACATCTGCCATGTCCACGCAGAGACTTCGGAATGAAGACTACCACGACTAC	118.5	151.625	7.25835	7.86067	135	96	121	122	158	95	179	174.5	7.49661	7.40234	7.0543	7.08014	8.00741	7.48863	7.99202	7.9546	hsa-miR-634	hsa-miR-765	hsa-miR-761	hsa-miR-665	hsa-miR-27a-3p
ASCRP3006152	0.0189145	0.371177	1.5156	down	hsa_circRNA_403982		25242744	chr8	+	1828213	1830915	exonic	NM_014629	ARHGEF10	CTCATCGCACAGGCTTTCTCATGACCTAACCCGTTTAAAGGAGCACTATGAGAAAAAGAT	90.25	121.875	7.06483	7.66472	95	107.5	83	75.5	118.5	107	130	132	7.17914	7.54488	6.79374	6.74156	7.61206	7.68504	7.67698	7.68482	hsa-miR-133a-3p	hsa-miR-133b	hsa-miR-2682-3p	hsa-miR-7152-3p	hsa-miR-544a
ASCRP3012173	0.0225101	0.371177	1.51225	down	hsa_circRNA_103726	hsa_circ_0070764	circBase	chr4	+	120138704	120177678	exonic	NM_019050	USP53	TGCGGTACATTTCTACAACAGCCTTATGATGCTTGGGATTTGCTTTACATTCTAAGTGGA	40.5	71.625	6.52315	7.11985	35	60	34	33	87	95.5	49	55	6.42226	6.88836	6.39314	6.38885	7.23618	7.4955	6.82338	6.92433	hsa-miR-148a-5p	hsa-miR-96-5p	hsa-miR-330-3p	hsa-miR-515-5p	hsa-let-7g-3p
ASCRP3006374	0.016932	0.371177	1.50962	down	hsa_circRNA_102570	hsa_circ_0051470	circBase	chr19	-	45860527	45860957	exonic	NM_000400	ERCC2	CTCTGCCCTATGGCTTCACCATCATCATCGAGCCCTTTGACGACAGAACCCCGACCATTG	211.5	221.375	7.79152	8.38571	171	156.5	263	255.5	223	256	205.5	201	7.73192	7.98369	7.73783	7.71264	8.47608	8.82786	8.12273	8.11617	hsa-miR-608	hsa-miR-193b-5p	hsa-miR-182-5p	hsa-miR-875-3p	hsa-miR-504-3p
ASCRP3001167	0.0194866	0.371177	1.5088	down	hsa_circRNA_100752	hsa_circ_0020976	circBase	chr11	-	5367002	5368140	exonic	NR_038321	OR51B5	ACAGTTAGATCTCATCTCTATGGGTGGAAGATGTTGAGAAGGAACAACATGATCTAAGTC	48.625	85.75	6.63593	7.22934	51	67	41.5	35	89	53	100	101	6.66305	7.01421	6.46478	6.4017	7.26074	6.86021	7.39287	7.40352	hsa-miR-633	hsa-miR-581	hsa-miR-1301-3p	hsa-miR-578	hsa-miR-512-5p
ASCRP3004850	0.00485902	0.371177	1.5062	down	hsa_circRNA_405719		25070500	chr19	-	5214371	5220364	exonic	NM_002850	PTPRS	CATTCTGCGTCAGGACATTCTCTCTGCACAAGGAGCTATTTCATTGTGATGGTGCCACTG	93.125	112.125	6.97039	7.5613	80	50	127	115.5	143	94	117.5	94	7.01784	6.75683	7.08906	7.01784	7.86448	7.47302	7.58644	7.32129	hsa-miR-3605-3p	hsa-miR-637	hsa-miR-4677-5p	hsa-miR-3620-5p	hsa-miR-1587
